# Supplementary material for: Anion–π recognition between [M(CN)6]3− complexes and HAT(CN)6: structural matching and electronic charge density modification
Source: Royal Society of Chemistry journal article supplement (doi:10.1039/c7dt00293a), 2017-01-01
Supplement: c7dt00293a1.pdf [file c7dt00293a1.pdf]

Electronic Supplementary Material (ESI)

# Anion- $\pi$ recognition between $[M(CN)_6]^{3-}$ complexes and $HAT(CN)_6$ : structural matching and electronic charge density modification

Jędrzej Kobylarczyk, Dawid Pinkowicz, Monika Srebro-Hooper, James Hooper, and Robert Podgajny\*

*<sup>a</sup>Faculty of Chemistry, Jagiellonian University in Krakow, Ingardena 3, 30-060 Krakow, Poland.  
E-mail: robert.podgajny@uj.edu.pl*

## Contents of Electronic Supplementary Material

|      |                                                                                                                        |         |
|------|------------------------------------------------------------------------------------------------------------------------|---------|
| I.   | Experimental part.....                                                                                                 | S2-S3   |
| II.  | Structural part.....                                                                                                   | S4-S14  |
|      | Table S1. Crystal data and structure refinement for <b>1</b> and <b>2</b> .....                                        | S4      |
|      | Table S2. Crystal data and structure refinement for <b>3</b> and <b>4</b> .....                                        | S5      |
|      | Figure S1-S2. Asymmetric unit of compounds <b>1</b> and <b>2</b> .....                                                 | S6      |
|      | Table S3. Distance and angle parameters of compound <b>1</b> and <b>2</b> .....                                        | S6      |
|      | Figure S3-S4. Asymmetric unit of compound <b>3</b> and <b>4</b> .....                                                  | S7      |
|      | Table S4. Distance and angle parameters of compound <b>3</b> and <b>4</b> .....                                        | S7      |
|      | Figures S5-S6. Additional structural views for structure <b>1-4</b> .....                                              | S8-S9   |
|      | Figure S7-S10. Powder X-ray diffraction patterns of <b>1-4</b> .....                                                   | S10-S11 |
|      | Table S5. Results of Continuous Shape Measure Analysis for metal centers in compounds <b>1-4</b> .....                 | S12     |
|      | Table S6. Geometrical parameters of anion – $\pi$ interactions in compounds <b>1-4</b> .....                           | S14     |
| III. | Physicochemical characterization.....                                                                                  | S15-S21 |
|      | Figure S11-S12. Thermogravimetric analysis of <b>1</b> , <b>2</b> , <b>3des</b> and <b>4des</b> .....                  | S15     |
|      | Figure S13. Magnetization vs magnetic field plot and $^{57}\text{Fe}$ Mössbauer spectra of <b>1</b> .....              | S16     |
|      | Table S7. Parameters of fitted Brillouin function.....                                                                 | S16     |
|      | Figure S14-S17. Infrared spectra of compounds <b>1</b> , <b>2</b> , <b>3des</b> and <b>4des</b> .....                  | S17-S18 |
|      | Figure S18-S19. Compare of IR spectra of <b>3des</b> and <b>4des</b> with starting complexes in $C\equiv N$ range..... | S19     |
|      | Figure S20-S21. Compare of UV-VIS-NIR spectra of <b>3des</b> and <b>4des</b> with starting materials.....              | S20     |
|      | Figure S22. UV-VIS titration of $HAT(CN)_6$ -with $TBA^+CN^-$ in MeCN solutions.....                                   | S21     |
|      | Table S8. Peaks in cyclic voltammogram <b>1</b> , <b>2</b> and $HAT(CN)_6$ .....                                       | S22     |
| IV.  | Computational Details.....                                                                                             | S23-S30 |
|      | Figure S23. Computed electrostatic potential (ESP) around $HAT(CN)_6$ .....                                            | S25     |
|      | Figure S24-S25. Computed electronic band structures of compound <b>1</b> , <b>2</b> , <b>4</b> .....                   | S26-S27 |
|      | Figure S26. Interaction energy between $HAT(CN)_6$ and a $XPh_4^n$ network in molecular cluster.....                   | S28     |
|      | Figure S27. Structure of the molecular clusters extracted from compounds <b>1</b> and <b>2</b> .....                   | S29     |
|      | Figure S28. Total charge deformation density of mol. cluster and contributions to $\Delta\rho$ from ERS-NOCV....       | S30     |
| V.   | References.....                                                                                                        | S31     |

## I. Experimental part

### Synthesis procedures and preliminary characteristic

**HAT(CN)<sub>6</sub>.** Hexaketocyclohexane octahydrate (2.0 g , 6.4 mmol) and diaminomaleonitrile (5.2 g, 48 mmol) were dissolved in 250 ml of glacial AcOH. The mixture was heated in reflux for 2 h. Resulting dark brown-black mixture was filtered and washed with hot glacial AcOH (3 x 40 ml). Obtained black solid was suspended into 35 % HNO<sub>3</sub> (40 ml) and was heated to 100°C for 3 hours. Crude product was obtained by mixture cooled to room temperature, poured into small portion of ice and filtered off. Purification of HAT(CN)<sub>6</sub> was performed by continuous extraction in Soxhlet apparatus (100 mL MeCN, 72 h, high reflux). Acetonitrile was removed by vacuum evaporation to give orange solid. Yield: 1.88 g, 77 %. IR (cm<sup>-1</sup>): 2256 ν(C≡N), 2241 ν(C≡N), 1713, 1622, 1528, 1467, 1458, 1400, 1342, 1317, 1249, 1237, 1200, 1146, 1084, 1052, 920, 809, 749, 706. <sup>13</sup>C NMR (300 MHz, CD<sub>3</sub>CN) δ (ppm): 112.9 , 135.4, 142.1

**(PPh<sub>4</sub>)<sub>3</sub>[Fe(CN)<sub>6</sub>]·HAT(CN)<sub>6</sub> (1).** Acetonitrile solutions of (PPh<sub>4</sub>)<sub>3</sub>[Fe(CN)<sub>6</sub>]·6H<sub>2</sub>O (0.2452 g, 0.18 mmol, 8 ml) and HAT(CN)<sub>6</sub> (0.0383 g, 0.1 mmol, 12 ml) were mixed to give a dark-green solution immediately. The solution was stirred for 30 min. The crystals of **1** suitable for crystallographic measurements were obtained by diffusion of diethyl ether vapour into this mixture. The green needle like crystals appeared after 1 day, then they were filtrated and washed with small amount of cold acetonitrile (4ml, -10°C) and dried in air. Yield: 132.4 mg, 82 %. Elemental analysis. Calcd for C<sub>96</sub>H<sub>60</sub>N<sub>18</sub>P<sub>3</sub>Fe: C, 71.4; H, 3.7; N, 15.6. Found: C, 71.1; H, 3.6; N, 15.6. IR ((PPh<sub>4</sub>)<sub>3</sub>[Fe(CN)<sub>6</sub>], a index; HAT-CN<sub>6</sub>, b index) (cm<sup>-1</sup>): 3066 ν(C-H)<sup>a</sup>, 3065 ν(C-H)<sup>a</sup>, 2244 ν(C≡N)<sup>b</sup>, 2236 ν(C≡N)<sup>b</sup>, 2115 ν(C≡N)<sup>a</sup>, 2110 ν(C≡N)<sup>a</sup>, 2098 ν(C≡N)<sup>a</sup>, 1588<sup>a</sup>, 1486<sup>a</sup>, 1467<sup>b</sup>, 1442<sup>a</sup>, 1437<sup>a</sup>, 1342<sup>b</sup>, 1317<sup>a</sup>, 1249<sup>b</sup>, 1237<sup>b</sup>, 1190<sup>a</sup>, 1151<sup>b</sup>, 1113<sup>a</sup>, 998<sup>a</sup>, 854<sup>a</sup>, 766<sup>a</sup>, 758<sup>a</sup>, 725<sup>a</sup>, 699<sup>a</sup>, 692<sup>a</sup>.

**(PPh<sub>4</sub>)<sub>3</sub>[Co(CN)<sub>6</sub>]·HAT(CN)<sub>6</sub> (2).** Acetonitrile solutions of (PPh<sub>4</sub>)<sub>3</sub>[Co(CN)<sub>6</sub>]·7H<sub>2</sub>O (0.2464 g, 0.18 mmol, 8 ml) and HAT(CN)<sub>6</sub> (0.0383 g, 0.1 mmol, 12 ml) were mixed to give a yellow solution immediately. The solution was stirred for 30 min. The crystals of **1** suitable for crystallographic measurements were obtained by diffusion of diethyl ether vapour into this mixture. The yellow needle like crystals appeared after 1 day, then they were filtrated and washed with small amount of cold acetonitrile (4ml, -10°C) and dried in air. Yield: 143.5 mg, 89 %. Elemental analysis. Calcd for C<sub>96</sub>H<sub>60</sub>N<sub>18</sub>P<sub>3</sub>Co: C, 71.3; H, 3.7; N, 15.6. Found: C, 71.0; H, 3.7; N, 15.5. . IR ((PPh<sub>4</sub>)<sub>3</sub>[Co(CN)<sub>6</sub>], a index; HAT-CN<sub>6</sub>, b index) (cm<sup>-1</sup>): 3086 ν(C-H)<sup>a</sup>, 3065 ν(C-H)<sup>a</sup>, 3017 ν(C-H)<sup>a</sup>, 2244 ν(C≡N)<sup>b</sup>, 2236 ν(C≡N)<sup>b</sup>, 2132 ν(C≡N)<sup>a</sup>, 2120 ν(C≡N)<sup>a</sup>, 2108 ν(C≡N)<sup>a</sup>, 1589<sup>a</sup>, 1486<sup>a</sup>, 1467<sup>b</sup>, 1446<sup>a</sup>, 1437<sup>a</sup>, 1342<sup>b</sup>, 1316<sup>a</sup>, 1250<sup>b</sup>, 1237<sup>b</sup>, 1220<sup>b</sup>, 1190<sup>a</sup>, 1151<sup>b</sup>, 1113<sup>a</sup>, 998<sup>a</sup>, 854<sup>a</sup>, 767<sup>a</sup>, 758<sup>a</sup>, 725<sup>a</sup>, 699<sup>a</sup>, 691<sup>a</sup>.

**(AsPh<sub>4</sub>)<sub>3</sub>[Fe(CN)<sub>6</sub>]·HAT(CN)<sub>6</sub>·2CH<sub>3</sub>CN·H<sub>2</sub>O (3).** Acetonitrile solutions of (AsPh<sub>4</sub>)<sub>3</sub>[Fe(CN)<sub>6</sub>]·3H<sub>2</sub>O (0.2724 g, 0.19 mmol 8 ml) and HAT(CN)<sub>6</sub> (0.0383 g, 0.1 mmol, 12 ml) were mixed to give a dark-green solution immediately. The solution was stirred for 30 min. The crystals of **3** suitable for crystallographic measurements were obtained by diffusion of diethyl ether vapour into this mixture. The green needle like crystals appeared after 1 day, then they were filtrated and washed with small amount of cold acetonitrile (4ml, -10°C). The composition of **3** was establish from crystal structure solution and refinement. While removed from solution exposed to ambient atmosphere, the crystals of **3** lose MeCN molecules and cracks visibly to produce the residue of the formula (AsPh<sub>4</sub>)<sub>3</sub>[Fe(CN)<sub>6</sub>]·HAT(CN)<sub>6</sub>·2H<sub>2</sub>O (**3des**) deduced from elemental analysis. Yield: 110.3 mg, 60 %. Elemental analysis. Calcd. for C<sub>96</sub>H<sub>64</sub>N<sub>18</sub>As<sub>3</sub>O<sub>2</sub>Fe for (AsPh<sub>4</sub>)<sub>3</sub>[Fe(CN)<sub>6</sub>]HAT(CN)<sub>6</sub>·2H<sub>2</sub>O: C, 64.7; H, 3.6; N, 14.2. Found: C, 64.9; H, 3.5; N, 14.2. TGA. The found weight loss of 2.2% in range 25-170 °C corresponds to the loss of 2 H<sub>2</sub>O

molecules per formula unit (2.02%). IR ((AsPh<sub>4</sub>)<sub>3</sub>[Fe(CN)<sub>6</sub>], a index; HAT(CN)<sub>6</sub>, b index) (cm<sup>-1</sup>): 3082 ν(C-H)<sup>a</sup>, 3061 ν(C-H)<sup>a</sup>, 3022 ν(C-H)<sup>a</sup>, 2247 ν(C≡N)<sup>b</sup>, 2161 ν(C≡N)<sup>a</sup>, 2101 ν(C≡N)<sup>a</sup>, 2098 ν(C≡N)<sup>a</sup>, 1656<sup>a</sup>, 1580<sup>a</sup>, 1484<sup>a</sup>, 1466<sup>b</sup>, 1442<sup>a</sup>, 1342<sup>b</sup>, 1314<sup>a</sup>, 1247<sup>b</sup>, 1235<sup>b</sup>, 1221<sup>b</sup>, 1187<sup>a</sup>, 1151<sup>b</sup>, 1083<sup>a,b</sup>, 1051<sup>b</sup>, 1024<sup>a</sup>, 998<sup>a</sup>, 986<sup>a</sup>, 924<sup>a,b</sup>, 851<sup>a</sup>, 746<sup>a,b</sup>, 690<sup>a</sup>.

**(AsPh<sub>4</sub>)<sub>3</sub>[Co(CN)<sub>6</sub>]·HAT(CN)<sub>6</sub>·2CH<sub>3</sub>CN·H<sub>2</sub>O (4).** Acetonitrile solutions of (AsPh<sub>4</sub>)<sub>3</sub>[Co(CN)<sub>6</sub>]·5H<sub>2</sub>O (0.2732 g, 0.19 mmol 8 ml) and HAT(CN)<sub>6</sub> (0.0383 g, 0.1 mmol, 12 ml) were mixed to give a yellow solution immediately. The solution was stirred for 30 min. The crystals of **4** suitable for crystallographic measurements were obtained by diffusion of diethyl ether vapour into this mixture. The yellow needle like crystals appeared after 1 day, then they were filtrated and washed with small amount of cold acetonitrile (4ml, -10°C). The composition of **4** was establish from crystal structure solution and refinement. While removed from solution exposed to ambient atmosphere, the crystals of **4** lose MeCN molecules and crack visibly to produce the residue of the formula (AsPh<sub>4</sub>)<sub>3</sub>[Fe(CN)<sub>6</sub>]HAT(CN)<sub>6</sub>·2H<sub>2</sub>O (**4des**) deduced from elemental analysis. Yield: 116.4 mg, 62 %. Elemental analysis. Calcd for C<sub>96</sub>H<sub>64</sub>N<sub>18</sub>As<sub>3</sub>O<sub>2</sub>Co for (AsPh<sub>4</sub>)<sub>3</sub>[Co(CN)<sub>6</sub>]HAT(CN)<sub>6</sub>·2H<sub>2</sub>O: C, 64.7.; H, 3.6; N, 14.2. Found: C, 64.6; H, 3.9; N, 14.1. The found weight loss of 1.9 % in range 25-240 °C corresponds to the loss of 2 H<sub>2</sub>O molecules per formula unit (2.02%). IR ((AsPh<sub>4</sub>)<sub>3</sub>[Co(CN)<sub>6</sub>], a index; HAT(CN)<sub>6</sub> b index) (cm<sup>-1</sup>): 3085 ν(C-H)<sup>a</sup>, 3060 ν(C-H)<sup>a</sup>, 3022 ν(C-H)<sup>a</sup>, 2247 ν(C≡N)<sup>b</sup>, 2243 ν(C≡N)<sup>b</sup>, 2163 ν(C≡N)<sup>a</sup>, 2131 ν(C≡N)<sup>a</sup>, 2111 ν(C≡N)<sup>a</sup>, 2108 ν(C≡N)<sup>a</sup>, 1658<sup>a</sup>, 1581<sup>a</sup>, 1484<sup>a</sup>, 1466<sup>b</sup>, 1442<sup>a</sup>, 1342<sup>b</sup>, 1313<sup>a</sup>, 1235<sup>b</sup>, 1220<sup>b</sup>, 1187<sup>a</sup>, 1151<sup>b</sup>, 1083<sup>a,b</sup>, 1024<sup>a</sup>, 998<sup>a</sup>, 986<sup>a</sup>, 924<sup>a,b</sup>, 851<sup>a</sup>, 746<sup>a,b</sup>, 690<sup>a</sup>.

## II. Structural part

**Table S1.** Crystal data and structure refinement for **1** and **2**

| Compound                                         | 1                                                                                                     | 2                                                                                                     |
|--------------------------------------------------|-------------------------------------------------------------------------------------------------------|-------------------------------------------------------------------------------------------------------|
| empirical formula                                | C <sub>96</sub> H <sub>60</sub> FeN <sub>18</sub> P <sub>3</sub>                                      | C <sub>96</sub> H <sub>60</sub> CoN <sub>18</sub> P <sub>3</sub>                                      |
| formula weight                                   | 1614.38                                                                                               | 1617.46                                                                                               |
| crystal system                                   | trigonal                                                                                              | trigonal                                                                                              |
| space group                                      | R3c                                                                                                   | R3c                                                                                                   |
| unit cell dimensions (Å, deg)                    | a = 27.6091(8)<br>b = 27.6091(8)<br>c = 18.7133(7)<br>$\alpha$ = 90<br>$\beta$ = 90<br>$\gamma$ = 120 | a = 27.5965(6)<br>b = 27.5965(6)<br>c = 18.6928(5)<br>$\alpha$ = 90<br>$\beta$ = 90<br>$\gamma$ = 120 |
| volume (Å <sup>3</sup> )                         | 12353.4(9)                                                                                            | 12328.6(6)                                                                                            |
| Z                                                | 6                                                                                                     | 6                                                                                                     |
| density, calcd (mg·m <sup>-3</sup> )             | 1.302                                                                                                 | 1.307                                                                                                 |
| temp (K)                                         | 120.1                                                                                                 | 120                                                                                                   |
| absorption coefficient (mm <sup>-1</sup> )       | 0.302                                                                                                 | 0.328                                                                                                 |
| F(000)                                           | 4998.0                                                                                                | 5004.0                                                                                                |
| wavelength (Å)                                   | 0.71073                                                                                               | 0.71073                                                                                               |
| crystal size (mm <sup>3</sup> )                  | 0.4 × 0.1 × 0.08                                                                                      | 0.65 × 0.14 × 0.12                                                                                    |
| 2 $\theta$ range for data collection (deg)       | 6.268 - 50.726                                                                                        | 6.272 to 50.298                                                                                       |
| index ranges                                     | -33 ≤ h ≤ 33<br>-32 ≤ k ≤ 33<br>-11 ≤ l ≤ 22                                                          | -31 ≤ h ≤ 32<br>-32 ≤ k ≤ 28<br>-22 ≤ l ≤ 22                                                          |
| reflections collected                            | 16997                                                                                                 | 49834                                                                                                 |
| independent reflections                          | 3369 [R <sub>int</sub> = 0.0421, R <sub>sigma</sub> = 0.0339]                                         | 4871 [R <sub>int</sub> = 0.0735, R <sub>sigma</sub> = 0.0383]                                         |
| completeness of $\theta$ (%)                     | 100                                                                                                   | 100                                                                                                   |
| max and min transmission                         | 0.745 and 0.680                                                                                       | 0.745 and 0.682                                                                                       |
| refinement method                                | Least Squares                                                                                         | Least Squares                                                                                         |
| data/restraints/parameters                       | 3369/1/357                                                                                            | 4871/1/356                                                                                            |
| goodness-of-fit on F <sup>2</sup>                | 1.055                                                                                                 | 1.042                                                                                                 |
| final R indices [I > 2 $\sigma$ (I)]             | R <sub>1</sub> = 0.0300<br>wR <sub>2</sub> = 0.0672                                                   | R <sub>1</sub> = 0.0321<br>wR <sub>2</sub> = 0.0631                                                   |
| R indices (all data)                             | R <sub>1</sub> = 0.0348<br>wR <sub>2</sub> = 0.0693                                                   | R <sub>1</sub> = 0.0412<br>wR <sub>2</sub> = 0.0660                                                   |
| extinction coefficient                           | 0.00027(5)                                                                                            | none                                                                                                  |
| largest diff. peak and hole (e·Å <sup>-3</sup> ) | 0.2700 and -0.3600                                                                                    | 0.2500 and -0.2800                                                                                    |

**Table S2.** Crystal data and structure refinement for **3** and **4**

| Compound                                         | 3                                                                                          | 4                                                                                          |
|--------------------------------------------------|--------------------------------------------------------------------------------------------|--------------------------------------------------------------------------------------------|
| empirical formula                                | C <sub>100</sub> H <sub>66</sub> As <sub>3</sub> FeN <sub>20</sub> O                       | C <sub>100</sub> H <sub>66</sub> As <sub>3</sub> CoN <sub>20</sub> O                       |
| formula weight                                   | 1844.33                                                                                    | 1847.41                                                                                    |
| crystal system                                   | monoclinic                                                                                 | monoclinic                                                                                 |
| space group                                      | Cc                                                                                         | Cc                                                                                         |
| unit cell dimensions (Å, deg)                    | a = 20.9359(4)<br>b = 27.5973(6)<br>c = 17.7530(6)<br>α = 90<br>β = 122.3080(10)<br>γ = 90 | a = 20.9033(7)<br>b = 27.5801(11)<br>c = 17.7843(10)<br>α = 90<br>β = 122.388(2)<br>γ = 90 |
| volume (Å <sup>3</sup> )                         | 8669.3(4)                                                                                  | 8658.0(7)                                                                                  |
| Z                                                | 4                                                                                          | 4                                                                                          |
| density, calcd (mg·m <sup>-3</sup> )             | 1.413                                                                                      | 1.417                                                                                      |
| temp (K)                                         | 120                                                                                        | 120                                                                                        |
| absorption coefficient (mm <sup>-1</sup> )       | 1.373                                                                                      | 1.399                                                                                      |
| F(000)                                           | 3.756                                                                                      | 3760.0                                                                                     |
| wavelength (Å)                                   | 0.71073                                                                                    | 0.71073                                                                                    |
| crystal size (mm <sup>3</sup> )                  | 0.7 × 0.15 × 0.13                                                                          | 0.43 × 0.15 × 0.11                                                                         |
| 2θ range for data collection (deg)               | 5.904 to 52.476                                                                            | 5.908 to 55.828                                                                            |
| index ranges                                     | -25 ≤ h ≤ 26<br>-28 ≤ k ≤ 34<br>-22 ≤ l ≤ 22                                               | -27 ≤ h ≤ 27<br>-36 ≤ k ≤ 24<br>-23 ≤ l ≤ 23                                               |
| reflections collected                            | 40105                                                                                      | 49511                                                                                      |
| independent reflections                          | 16750 [R <sub>int</sub> = 0.0694,<br>R <sub>sigma</sub> = 0.0901]                          | 19789 [R <sub>int</sub> = 0.0524,<br>R <sub>sigma</sub> = 0.0665]                          |
| completeness of θ (%)                            | 99                                                                                         | 98                                                                                         |
| max and min transmission                         | 0.745 and 0.624                                                                            | 0.746 and 0.593                                                                            |
| refinement method                                | Least Squares                                                                              | Least Squares                                                                              |
| data/restraints/parameters                       | 16750/2/1129                                                                               | 19789/2/1130                                                                               |
| goodness-of-fit on F <sup>2</sup>                | 1.021                                                                                      | 1.018                                                                                      |
| final R indices [I > 2σ(I)]                      | R <sub>1</sub> = 0.0479<br>wR <sub>2</sub> = 0.0794                                        | R <sub>1</sub> = 0.0376,<br>wR <sub>2</sub> = 0.0658                                       |
| R indices (all data)                             | R <sub>1</sub> = 0.0702, wR <sub>2</sub> = 0.0864                                          | R <sub>1</sub> = 0.0503, wR <sub>2</sub> = 0.0697                                          |
| extinction coefficient                           | none                                                                                       | none                                                                                       |
| largest diff. peak and hole (e·Å <sup>-3</sup> ) | 0.5800 and -0.4300                                                                         | 0.4300 and -0.4400                                                                         |

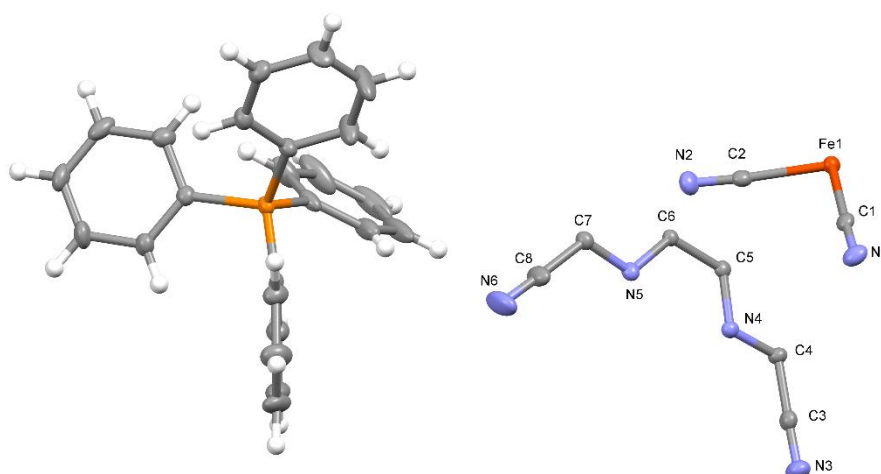

**Figure S1.** Asymmetric unit of compound **1**. Probability ellipsoids: 50 %. Colors: Fe (dark orange), P (pale orange), N (blue), C (gray), H (white).

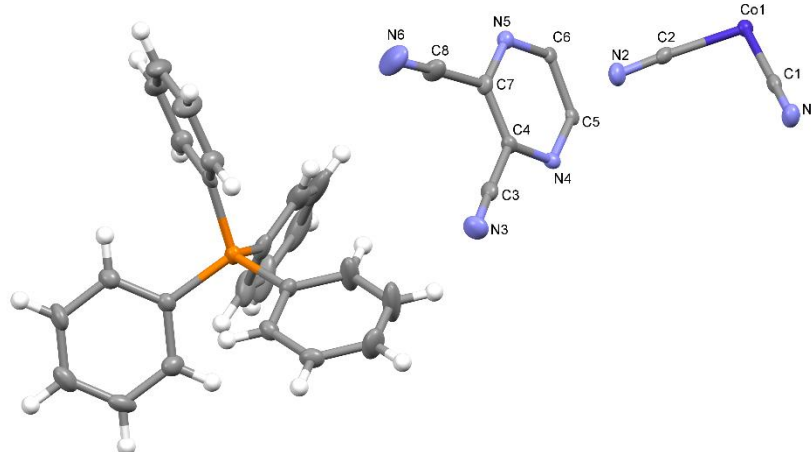

**Figure S2.** Asymmetric unit of compound **2**. Probability ellipsoids: 50 %. Colors: Co (dark blue), P (pale orange), N (blue), C (gray), H (white).

**Table S3.** Distance and angle parameters of compound **1** and **2**. (C1', C2' – means atom generated by symmetry)

| Compound 1 |          |                |        | Compound 2 |          |                |        |
|------------|----------|----------------|--------|------------|----------|----------------|--------|
| Parameter  | [Å]      | Parameter      | [deg]  | Parameter  | [Å]      | Parameter      | [deg]  |
| Fe1 – C1   | 1.953    | C1 – Fe1 – C2  | 91.45  | Co1 – C1   | 1.909    | C1 – Co1 – C2  | 86.82  |
| Fe1 – C2   | 1.968    | C1 – Fe1 – C1' | 89.30  | Co1 – C2   | 1.921    | C1 – Co1 – C1' | 89.22  |
| C1 – N1    | 1.147    | C1 – Fe1 – C2' | 86.08  | C1 – N1    | 1.148(5) | C1 – Co1 – C2' | 91.59  |
| C2 – N2    | 1.156    | C2 – Fe1 – C2' | 93.22  | C2 – N2    | 1.153(6) | C2 – Co1 – C2' | 92.42  |
| C3 – N3    | 1.136(4) | Co1 – C1 – N1  | 178.08 | C3 – N3    | 1.140(6) | Co1 – C1 – N1  | 177.80 |
| C4 – N4    | 1.453(5) | Co1 – C2 – N2  | 175.24 | C4 – N4    | 1.322(4) | Co1 – C2 – N2  | 175.67 |
| C5 – N4    | 1.339(4) |                |        | C5 – N4    | 1.337(6) |                |        |
| C6 – N5    | 1.341(5) |                |        | C6 – N5    | 1.344(4) |                |        |
| C7 – N5    | 1.317(3) |                |        | C7 – N5    | 1.318(6) |                |        |
| C8 – N6    | 1.139(6) |                |        | C8 – N6    | 1.138(5) |                |        |
| C3 – C4    | 1.453(5) |                |        | C3 – C4    | 1.448(7) |                |        |
| C5 – C6    | 1.455(4) |                |        | C4 – C7    | 1.407(4) |                |        |
| C7 – C8    | 1.455(6) |                |        | C5 – C6    | 1.410(4) |                |        |
|            |          |                |        | C7 – C8    | 1.455(5) |                |        |

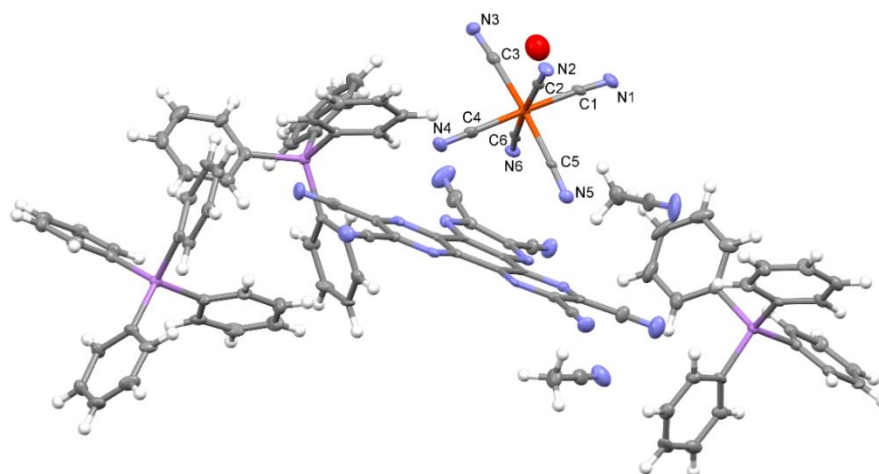

**Figure S3.** Asymmetric unit of compound **3**. Probability ellipsoids: 50 %. Colors: Fe (orange), As (purple), O (red), N (blue), C (gray), H (white).

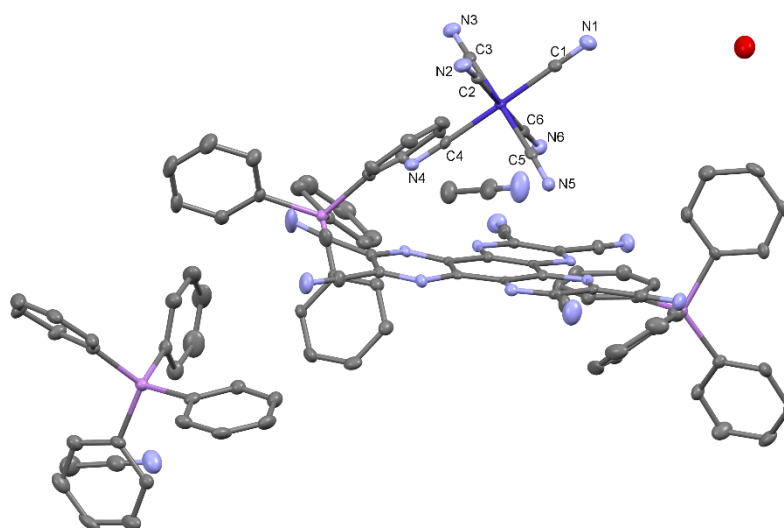

**Figure S4.** Asymmetric unit of compound **4**. Probability ellipsoids: 50 %. Colors: Co (dark blue), As (purple), O (red), N (blue), C (gray). Hydrogen atoms were omitted for clarity.

**Table S4.** Distance and angle parameters of compound **3** and **4**.

| Compound 3 |           |               |          | Compound 4 |          |               |          |
|------------|-----------|---------------|----------|------------|----------|---------------|----------|
| Parameter  | [Å]       | Parameter     | [deg]    | Parameter  | [Å]      | Parameter     | [deg]    |
| Fe1 – C1   | 1.972(7)  | Fe1 – C1 – N1 | 176.1(7) | Co1 – C1   | 1.910(4) | Co1 – C1 – N1 | 179.5(4) |
| Fe1 – C2   | 1.965(6)  | Fe1 – C2 – N2 | 179.5(6) | Co1 – C2   | 1.916(5) | Co1 – C2 – N2 | 176.0(4) |
| Fe1 – C3   | 1.967(9)  | Fe1 – C3 – N3 | 176.3(7) | Co1 – C3   | 1.919(7) | Co1 – C3 – N3 | 176.8(5) |
| Fe1 – C4   | 1.970(8)  | Fe1 – C4 – N4 | 178.3(7) | Co1 – C4   | 1.909(4) | Co1 – C4 – N4 | 175.4(5) |
| Fe1 – C5   | 1.952(9)  | Fe1 – C5 – N5 | 177.5(6) | Co1 – C5   | 1.905(7) | Co1 – C5 – N5 | 177.4(5) |
| Fe1 – C6   | 1.955(6)  | Fe1 – C6 – N6 | 175.0(6) | Co1 – C6   | 1.920(5) | Co1 – C6 – N6 | 177.7(4) |
| C1 – N1    | 1.140(10) |               |          | C1 – N1    | 1.150(5) |               |          |
| C2 – N2    | 1.141(7)  |               |          | C2 – N2    | 1.152(7) |               |          |
| C3 – N3    | 1.150(10) |               |          | C3 – N3    | 1.150(8) |               |          |
| C4 – N4    | 1.150(10) |               |          | C4 – N4    | 1.153(5) |               |          |
| C5 – N5    | 1.140(10) |               |          | C5 – N5    | 1.153(8) |               |          |
| C6 – N6    | 1.150(8)  |               |          | C6 – N6    | 1.161(7) |               |          |

### Additional structural views

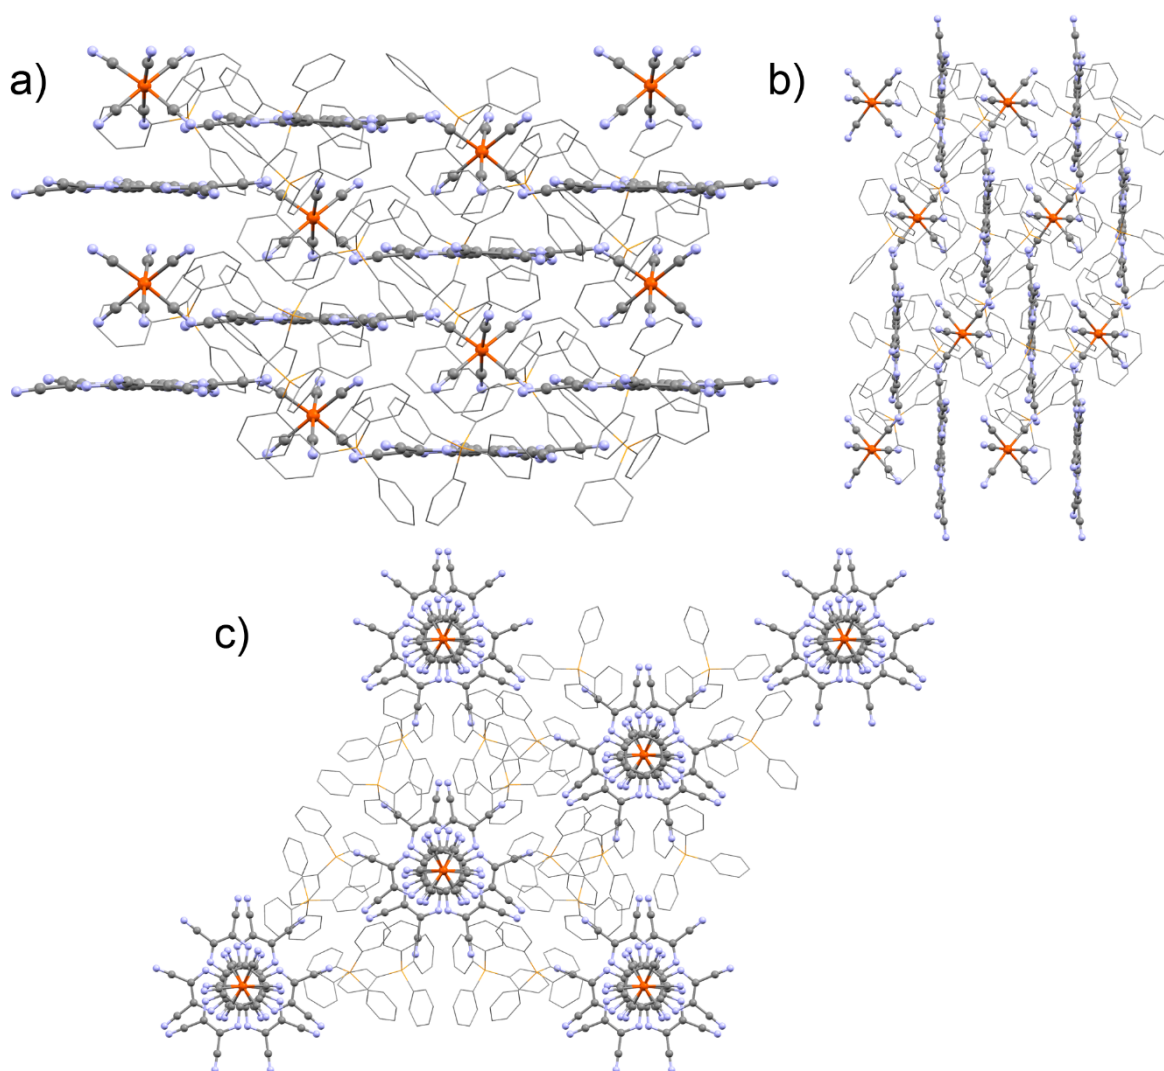

**Figure S5.** The crystal structure of **1** representative for compounds **1** and **2**. (a) View on crystal structure of **1** perpendicular to crystallographic a direction. (b) View on crystal structure of **1** perpendicular to crystallographic b direction. (c) View on crystal structure of **1** perpendicular to crystallographic c direction.



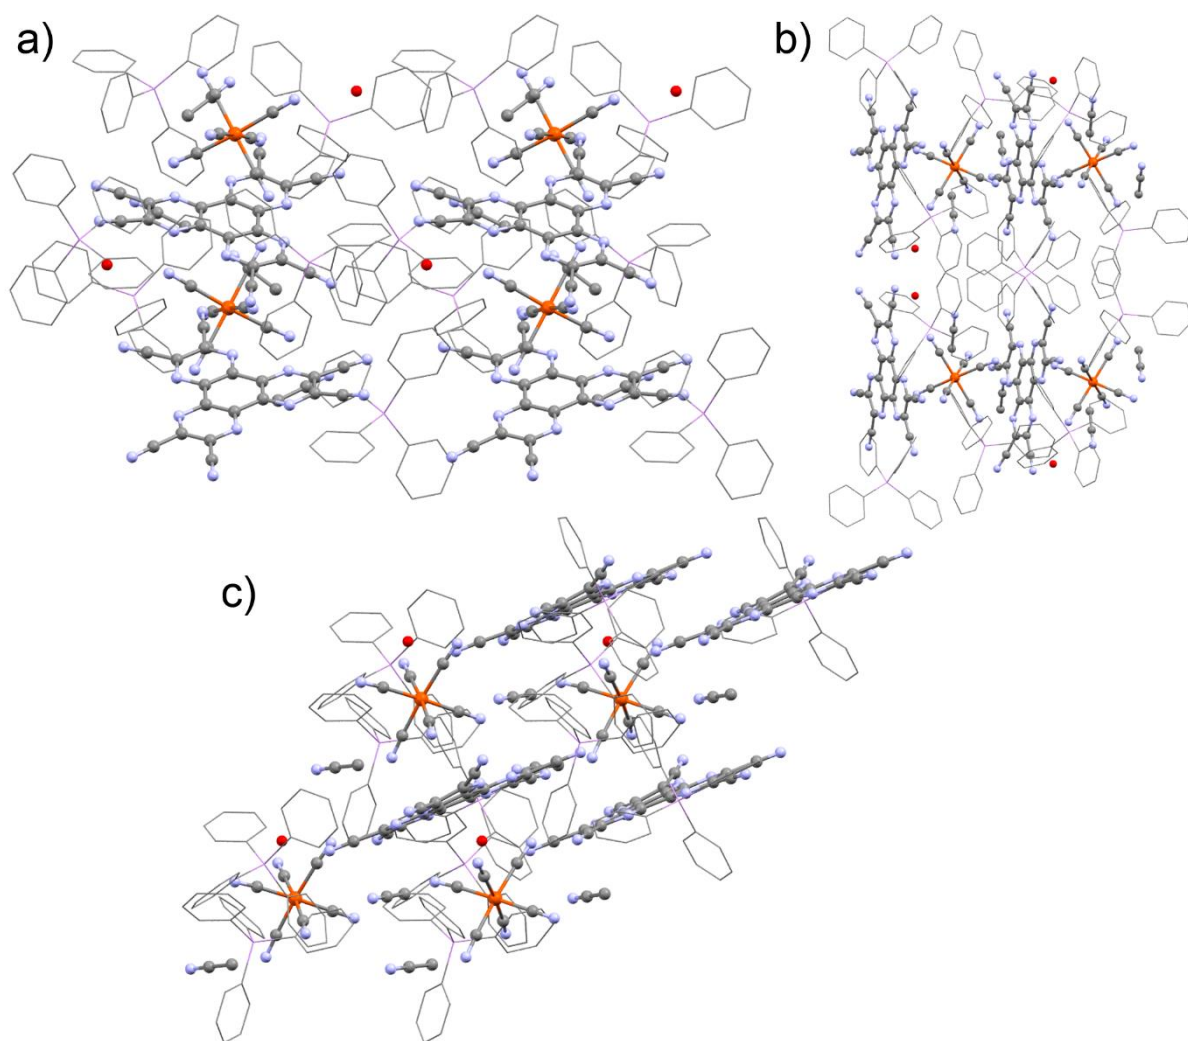

**Figure S6.** The crystal structure of **3** representative for compounds **3** and **4**. (a) View on crystal structure of **3** perpendicular to crystallographic a direction. (b) View on crystal structure of **3** perpendicular to crystallographic b direction. (c) View on crystal structure of **3** perpendicular to crystallographic c direction.

## Powder X-Ray Diffraction (PXRD)

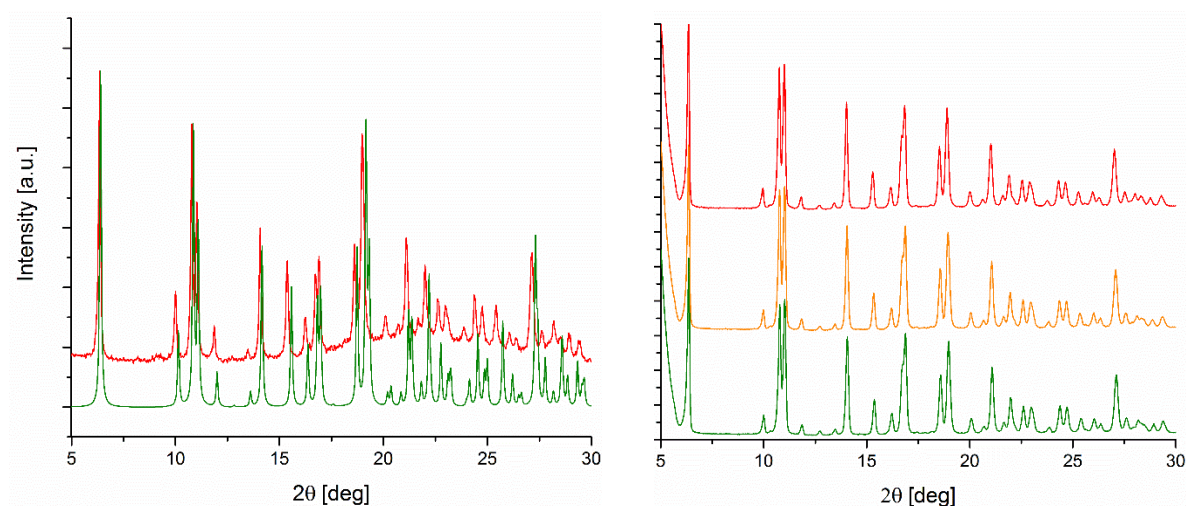

**Figure S7.** (Left) Powder X-ray diffraction patterns of **1** in the 5-30° range of  $2\theta$  angle: experimental (red line) and calculated from single crystal X-ray model (green line). Shift of PXRD peaks in relation to the calculated from XRD is related to standard temperature effect. XRD (120K), PXRD (RT). (Right) The structural stability of **1** represented by the PXRD patterns in 25 °C (green), 50 °C (yellow) and 100 °C (red).

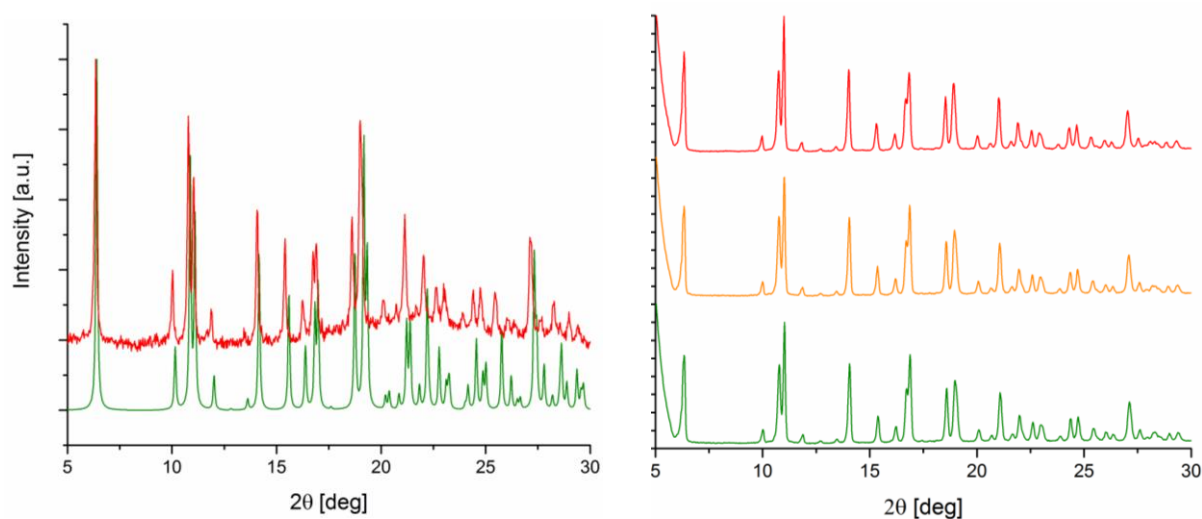

**Figure S8.** (Left) Powder X-ray diffraction patterns of **2** in the 5-30° range of  $2\theta$  angle: experimental (red line) and calculated from single crystal X-ray model (green line). Shift of PXRD peaks in relation to the calculated from XRD is related to standard temperature effect. XRD (120K), PXRD (RT). (Right) The structural stability of **2** represented by the PXRD patterns in 25 °C (green), 50 °C (yellow) and 100 °C (red).

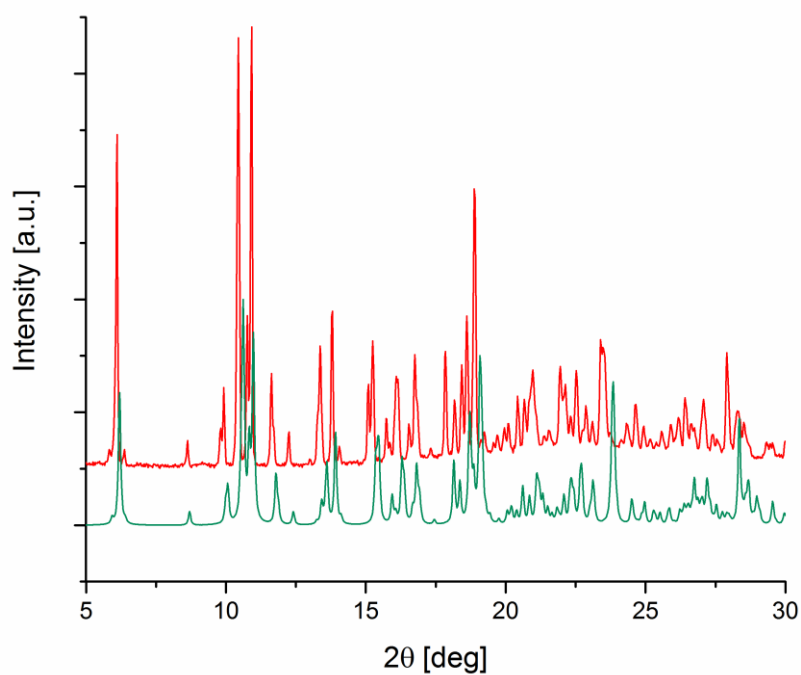

**Figure S9.** Powder X-ray diffraction patterns of **3** in the 5-30° range of 2 $\theta$  angle: experimental (red line) and calculated from single crystal X-ray model (green line). Shift of PXRD peaks in relation to the calculated from XRD is related to standard temperature effect. XRD (120K), PXRD (RT).

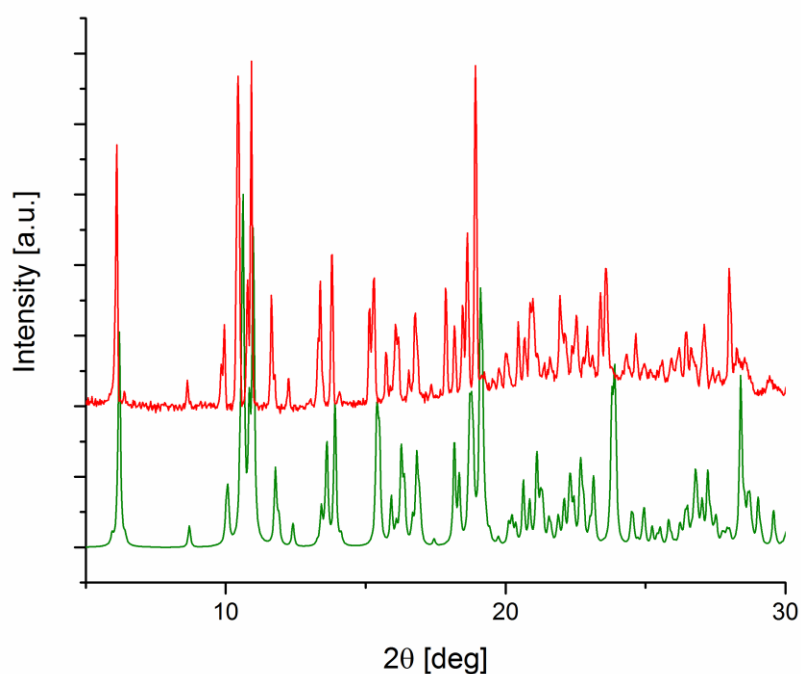

**Figure S10.** Powder X-ray diffraction patterns of **4** in the 5-30° range of 2 $\theta$  angle: experimental (red line) and calculated from single crystal X-ray model (green line). Shift of PXRD peaks in relation to the calculated from XRD is related to standard temperature effect. XRD (120K), PXRD (RT).

## CSM Calculations

**Table S5.** Results of Continuous Shape Measure Analysis for  $[\text{Fe}(\text{CN})_6]^{3-}$  unit in **1, 3** and  $[\text{Co}(\text{CN})_6]^{3-}$  unit in **2, 4**.

| Compound 1 |                |        |        | Geometry |
|------------|----------------|--------|--------|----------|
| Centre     | CSM parameters |        |        |          |
|            | OC-6           | TPR-6  | PPY-6  |          |
| Fe         | 0.165          | 15.043 | 28.682 | OC-6     |
| Compound 2 |                |        |        | Geometry |
| Centre     | CSM parameters |        |        |          |
|            | OC-6           | TPR-6  | PPY-6  |          |
| Co         | 0.117          | 15.094 | 28.808 | OC-6     |
| Compound 3 |                |        |        | Geometry |
| Centre     | CSM parameters |        |        |          |
|            | OC-6           | TPR-6  | PPY-6  |          |
| Fe         | 0.146          | 14.920 | 27.942 | OC-6     |
| Compound 4 |                |        |        | Geometry |
| Centre     | CSM parameters |        |        |          |
|            | OC-6           | TPR-6  | PPY-6  |          |
| Co         | 0.088          | 15.336 | 28.500 | OC-6     |

Polyhedra codes:

OC-6 – parameter of octahedron geometry related to the  $O_h$  symmetry

TPR-6 – parameter of trigonal prism geometry related to the  $D_{3h}$  symmetry

PPY-6 – parameter of pentagonal pyramid geometry related to  $C_{5v}$  symmetry

CSM parameter for ideal geometry equal 0 and increase with distortion from the ideal polyhedron.

## Anion- $\pi$ interactions

The  $\alpha_1$  angle is formed between the interaction distance vector  $d$  and the vector normal to the ring plane, while the  $\alpha_2$  angle is formed between the vector normal to the ring plane and the vector of cyanide bond. The full set of results is presented in the Table S5.

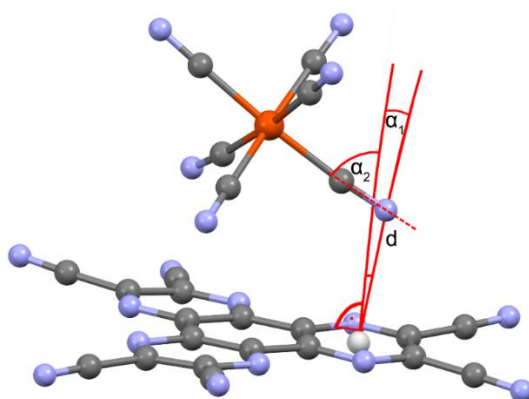

**Table S6.** Geometrical parameters of anion –  $\pi$  interactions in compounds **1-4**.

| Interaction          | Compound 1                        |                      | Compound 2                        |                      |
|----------------------|-----------------------------------|----------------------|-----------------------------------|----------------------|
|                      | $\alpha_1, \alpha_2$ ( $^\circ$ ) | $d$ ( $\text{\AA}$ ) | $\alpha_1, \alpha_2$ ( $^\circ$ ) | $d$ ( $\text{\AA}$ ) |
| CN N1 $\cdots$ centr | 5.1(1), 52.1(2)                   | 2.952                | 2.9(1), 51.6(2)                   | 2.945                |
| CN N2 $\cdots$ centr | 6.5(1), 44.0(2)                   | 2.990                | 7.1(1), 43.7(2)                   | 2.989                |
| Interaction          | Compound 3                        |                      | Compound 4                        |                      |
|                      | $\alpha_1, \alpha_2$ ( $^\circ$ ) | $d$ ( $\text{\AA}$ ) | $\alpha_1, \alpha_2$ ( $^\circ$ ) | $d$ ( $\text{\AA}$ ) |
| CN N1 $\cdots$ centr | 13.2(1), 42.1(2)                  | 3.157                | 13.2(1), 42.6(2)                  | 3.203                |
| CN N2 $\cdots$ centr | 9.4(1), 28.3 (2)                  | 2.934                | 8.5(1), 27.4 (2)                  | 2.924                |
| CN N3 $\cdots$ centr | 6.3(1), 58.0(2)                   | 2.943                | 6.5(1), 56.5(2)                   | 2.940                |
| CN N4 $\cdots$ centr | 17.0(1), 38.9(2)                  | 2.926                | 17.0(1), 37.9(2)                  | 2.917                |
| CN N5 $\cdots$ centr | 10.0(1), 47.8(2)                  | 2.896                | 9.8(1), 47.4(2)                   | 2.906                |
| CN N6 $\cdots$ centr | 12.3(1), 30.0(2)                  | 3.117                | 11.4(1), 29.9(2)                  | 3.083                |

The distinguishable feature of compounds **3** and **4** is the broken symmetry along HAT(CN)<sub>6</sub>/M(CN)<sub>6</sub> chains. The HAT(CN)<sub>6</sub> molecules in all four compounds adopt distorted geometries; they twist slightly out-of-plane in compounds **1** and **2**, for example, in response to the surrounding PPh<sub>4</sub><sup>+</sup> contacts and to the [M(CN)<sub>6</sub>]<sup>3-</sup> complex above HAT(CN)<sub>6</sub>, having a slightly different twist than the [M(CN)<sub>6</sub>]<sup>3-</sup> complex below it. The differences in geometry above and below the approximated plane of HAT(CN)<sub>6</sub> results in two distinct data points on each plot in Figures S5b and S5c. The data points are shown above in Table S5, where  $\alpha_1 = 5.1(1)^\circ$ ,  $\alpha_2 = 52.1(2)^\circ$  (**1**) and  $\alpha_1 = 2.9(1)^\circ$ ,  $\alpha_2 = 51.6(2)^\circ$  (**2**) for one side of HAT(CN)<sub>6</sub>

(<sub>CN</sub>N1...centr in Table S5), while on the opposite side of HAT(CN)<sub>6</sub> they are  $\alpha_1 = 6.5(1)^\circ$ ,  $\alpha_2 = 44.0(2)^\circ$  (**1**) and  $\alpha_1 = 7.1(1)^\circ$ ,  $\alpha_2 = 43.7(2)^\circ$  (**2**) (<sub>CN</sub>N2...centr in Table S5).

Also the distortion of HAT(CN)<sub>6</sub> is much more pronounced in the lower symmetry **3** and **4** compounds and this can be seen by the spread of data points for **3** and **4** in Fig. S5b and Fig. S5c of the main text, the data points reproduced in Table S5. This can be attributed to a severe bending of one –CN group that lies near a non-typical side interaction between this particular –CN group, the nearby CN<sup>-1</sup> ligands, and a nearby crystallized H<sub>2</sub>O molecule (Fig. S3 and Fig. S4), the latter of which is absent in **1** and **2**. The resulting anion- $\pi$  interaction vector  $d$  is significantly longer at this contact (3.2 Å), compared to the majority of cases observed in **1-4**.

### III. Physicochemical characterization

#### Thermogravimetric Analysis (TGA)

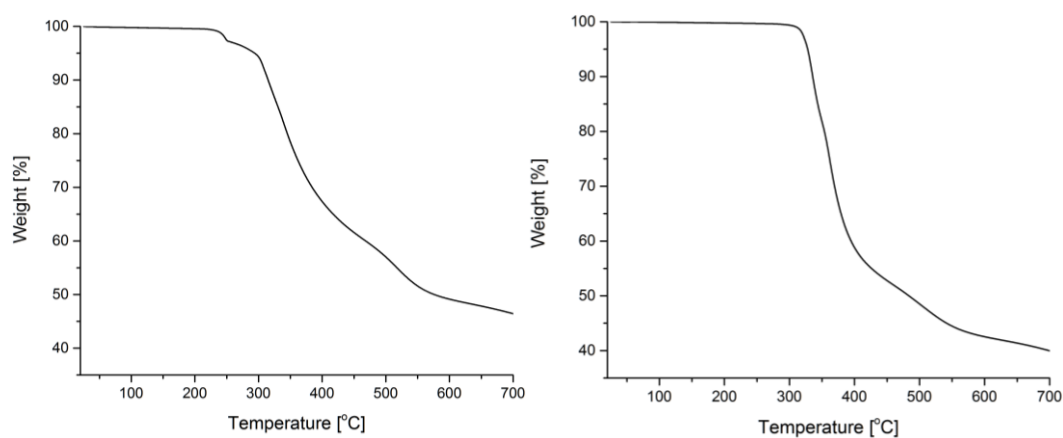

**Figure S11.** Thermogravimetric curves of **1** (left) and **2** (right) in 25 – 700 (°C) range. No weight loss was found up to 250 °C or 300 °C, respectively.

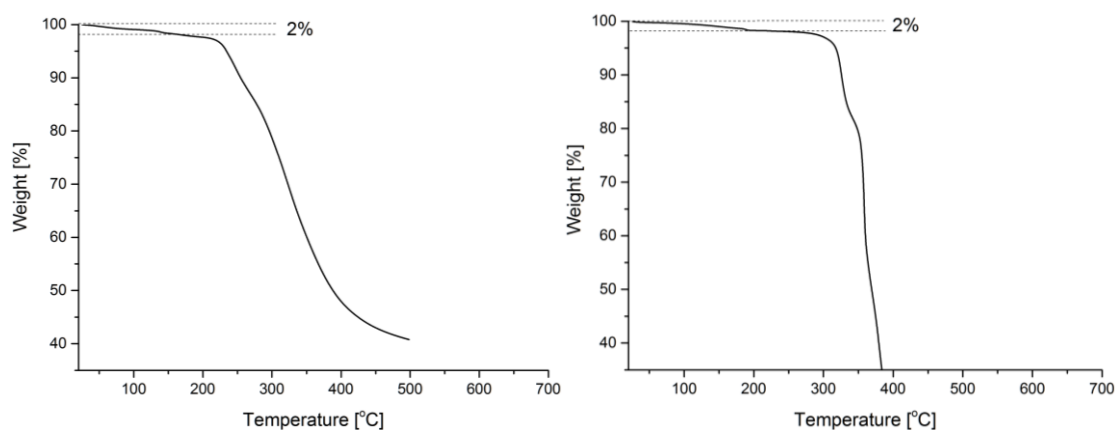

**Figure S12.** Thermogravimetric curves of **3des** (left) and **4des** (right). The weight loss of 2% in both cases up to 170 °C and 240 °C, respectively, corresponds to the loss of 2H<sub>2</sub>O molecules per formula unit, in a perfect agreement with the results of elemental analyses (compare experimental part).

## Oxidation state

(a)

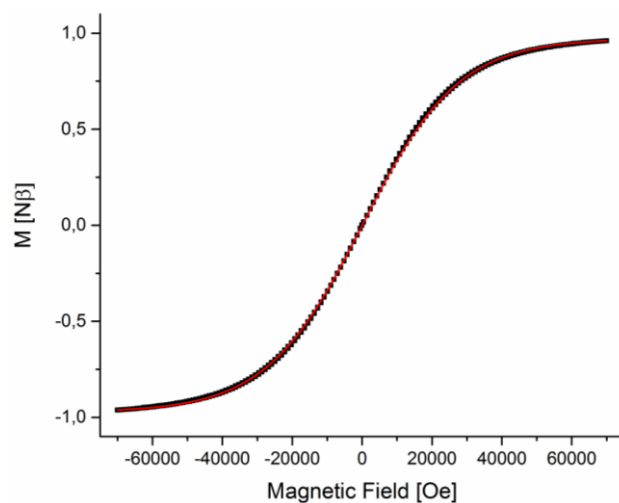

(b)

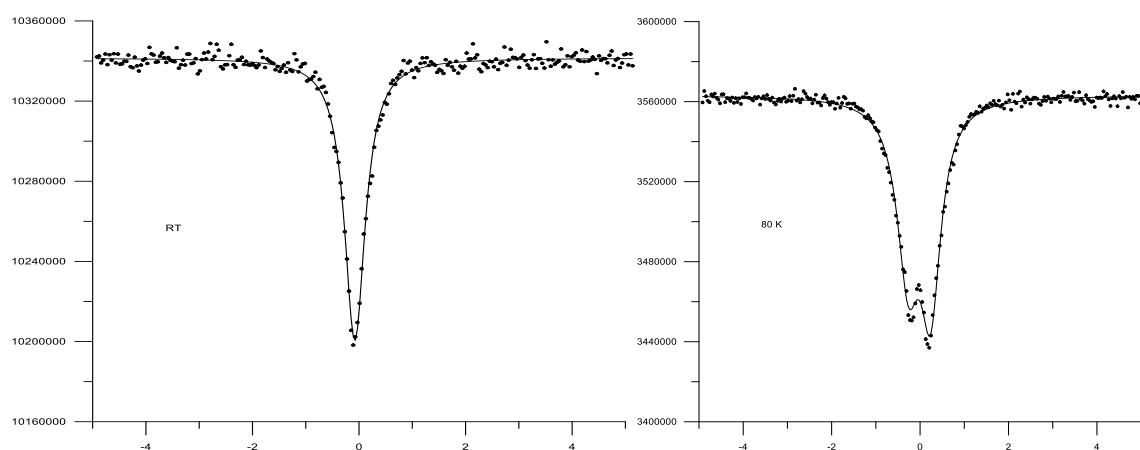

**Figure S13.** (a) Magnetization vs magnetic field **1** in 1.8 K: experimental (black points) and fitted using the Brillouin function assuming  $S = \frac{1}{2}$ . (red line). (b) Mössbauer spectra of **1** in RT (left) and in 80 K (right). The isomeric shift close to 0 and quadrupole splitting less than  $0.5 \text{ mm} \cdot \text{s}^{-1}$  are consistent with the  $^{\text{LS}}\text{Fe}^{\text{III}}$  state in  $[\text{Fe}(\text{CN})_6]^{3-}$ .

**Table S5.** Parameters of fitted Brillouin function.

| Model            | Brillouin Function  |
|------------------|---------------------|
| G                | $1.9460 \pm 0.0007$ |
| Magnetic Centers | 1                   |
| T                | 1.8K                |
| Reduced Chi-Sqr  | $3.85391\text{E-}5$ |
| R-Square (COD)   | 0.99993             |
| Adj. R-Square    | 0.99993             |



## Infrared Spectra

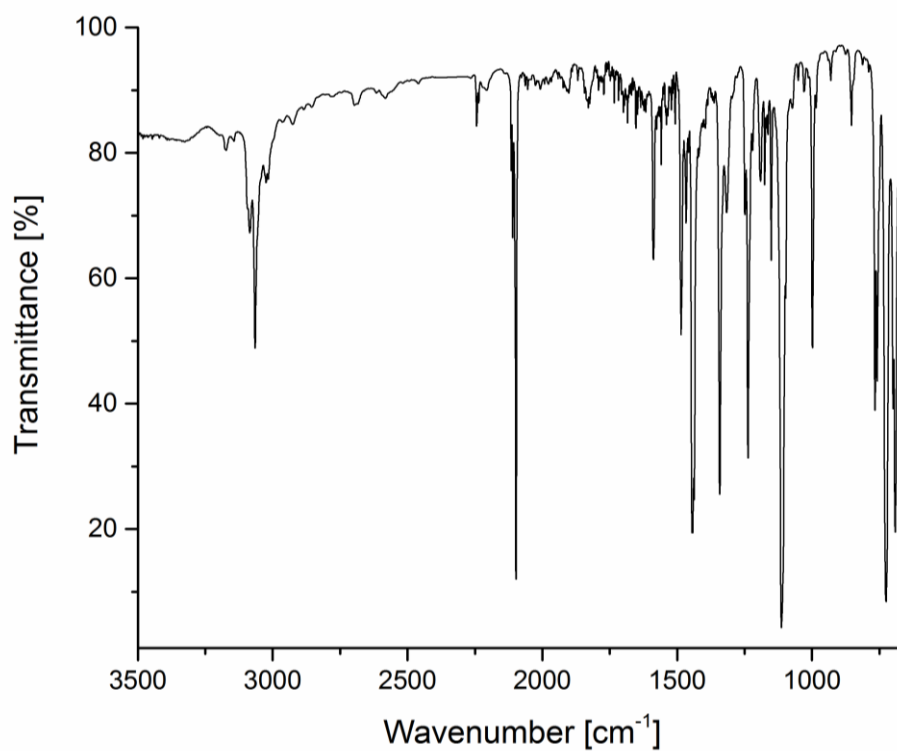

**Figure S14.** Infrared spectrum of **1** in 3500 – 675 cm<sup>-1</sup> range.

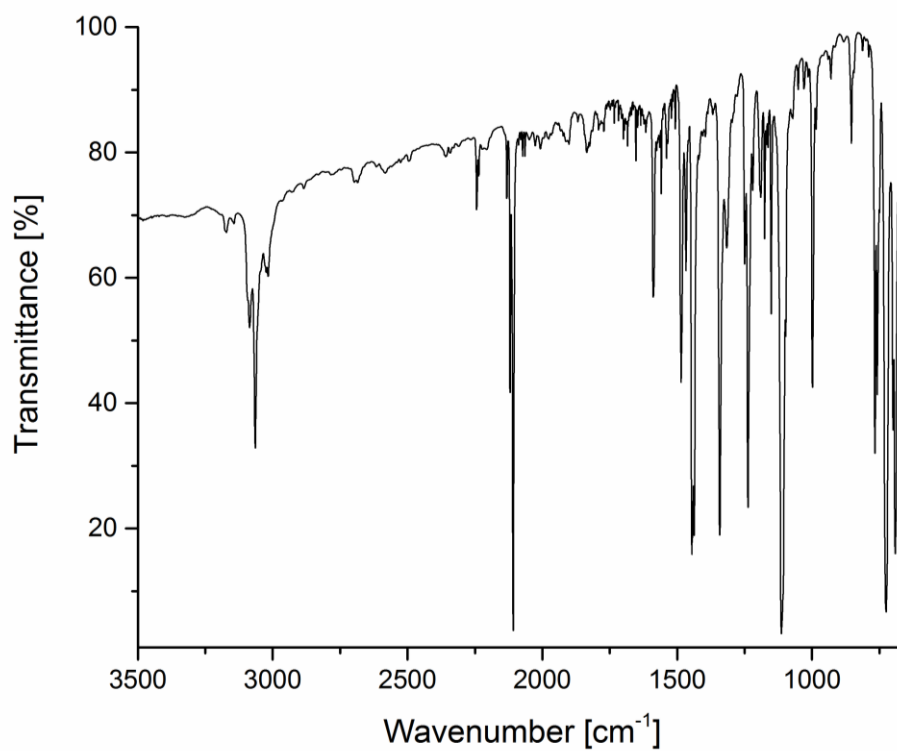

**Figure S15.** Infrared spectrum of **2** in 3500 – 675 cm<sup>-1</sup> range.

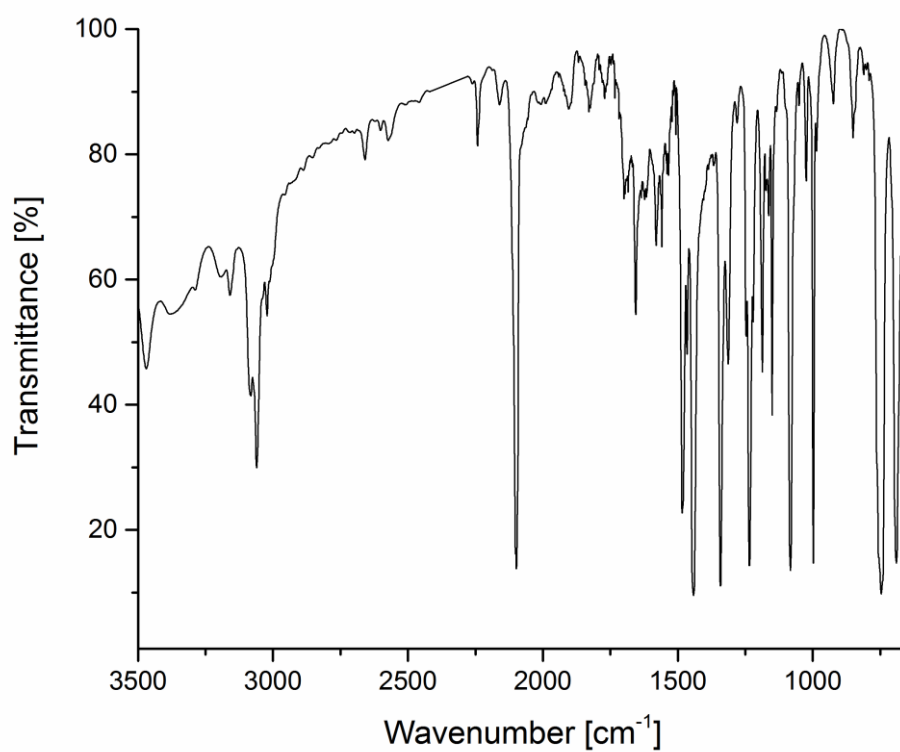

**Figure S16.** Infrared spectrum of **3des** in 3500 – 675  $\text{cm}^{-1}$  range.

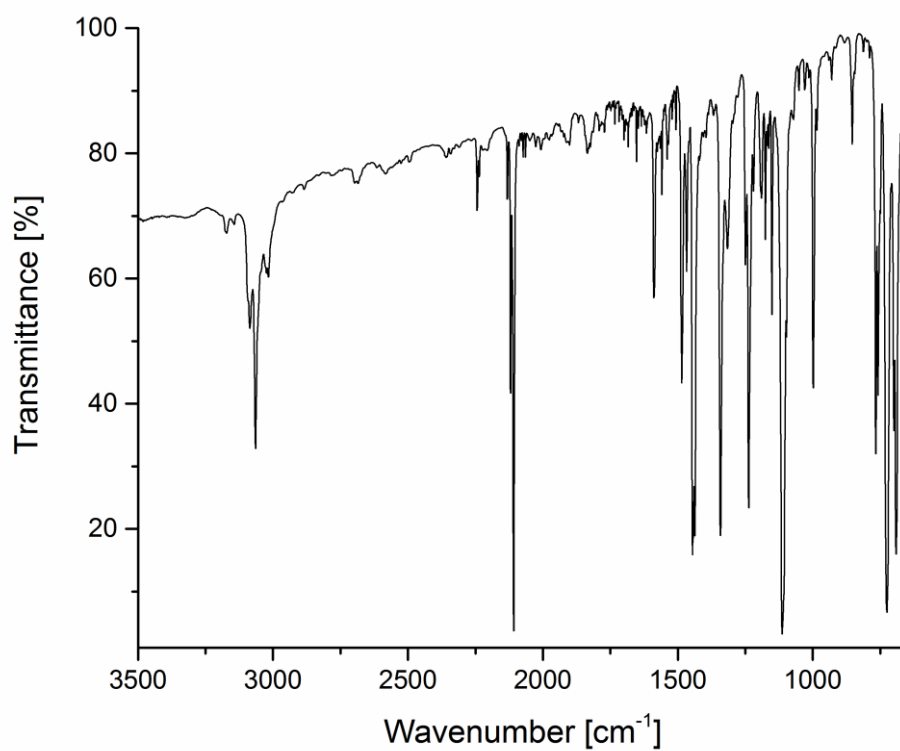

**Figure S17.** Infrared spectrum of **4des** in 3500 – 675  $\text{cm}^{-1}$  range.

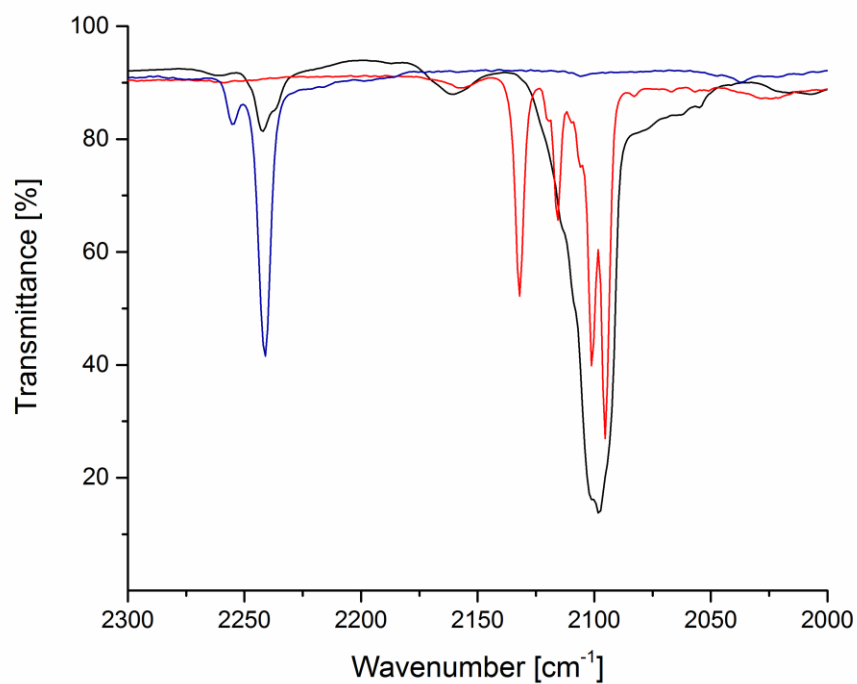

**Figure S18.** Compare of infrared spectrum of **3des** (black), starting complex (red) and HAT(CN)<sub>6</sub> (navy blue) in 2300 – 2000 cm<sup>-1</sup> range.

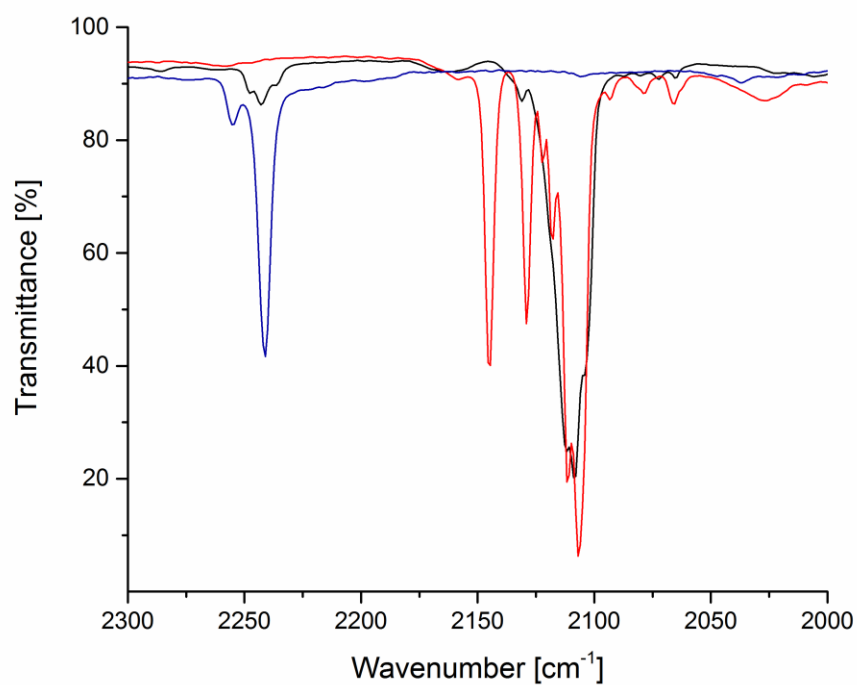

**Figure S19.** Compare of infrared spectrum of **4des** (black), starting complex (red) and HAT(CN)<sub>6</sub> (navy blue) in 2300 – 2000 cm<sup>-1</sup> range.

## UV-VIS-NIR Spectra.

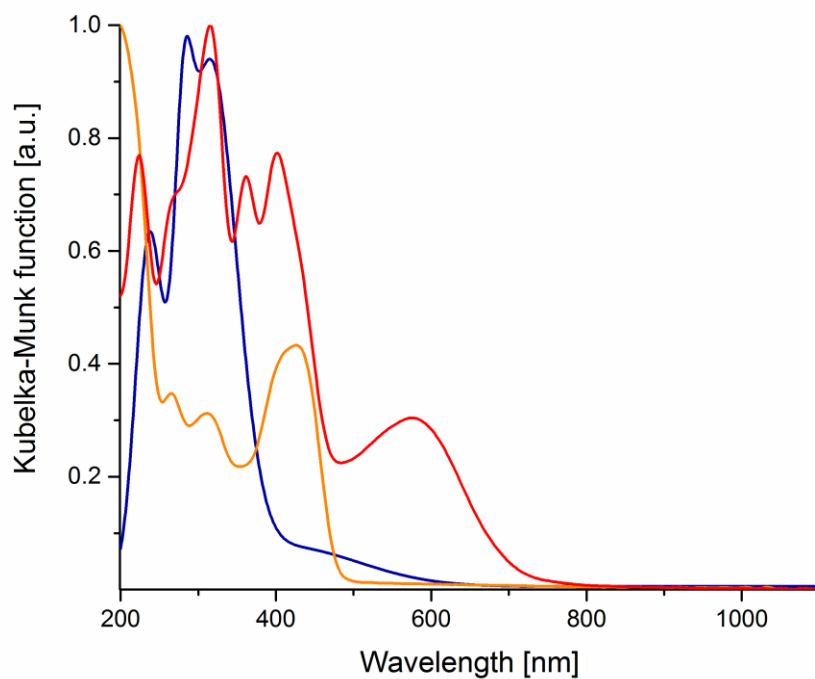

**Figure S20.** Compared UV-VIS-NIR solid state spectra of **3des** (red), starting complex (orange),  $\text{HAT(CN)}_6$  (navy blue).

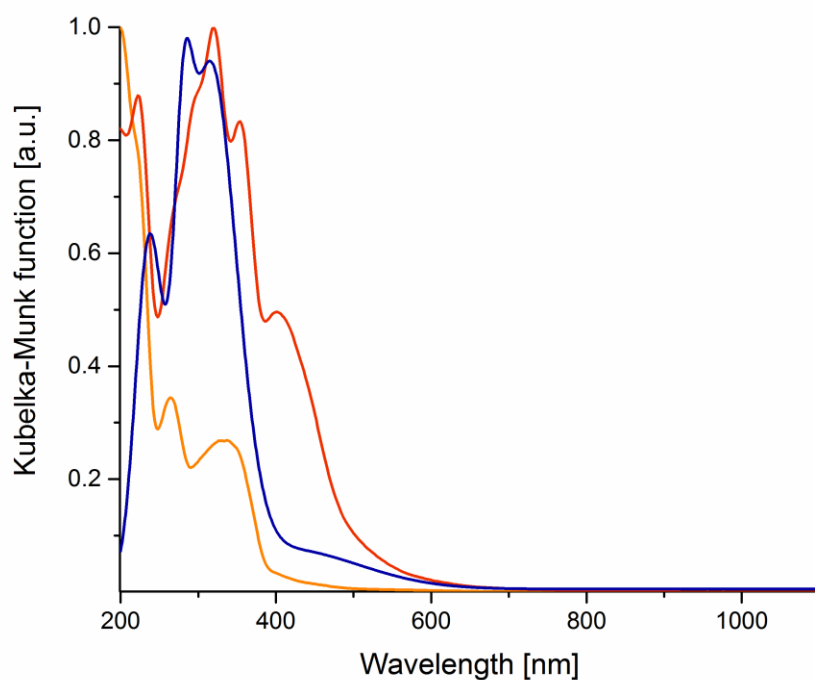

**Figure S21.** Compared UV-VIS-NIR solid state spectra of **4des** (red), starting complex (orange),  $\text{HAT(CN)}_6$  (navy blue).

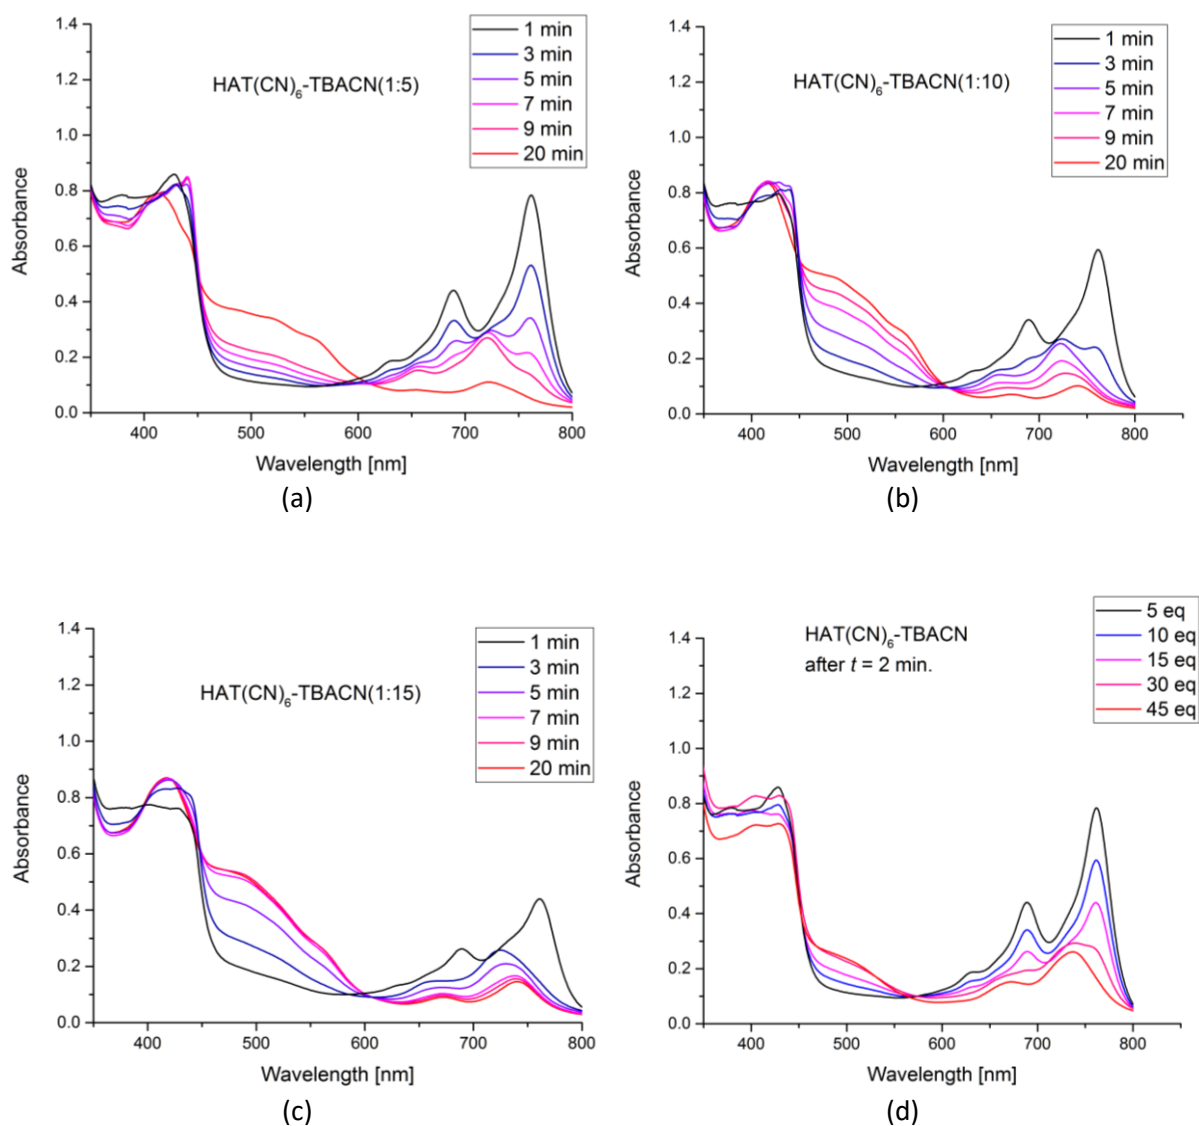

**Figure S22.** UV-VIS electronic spectra of HAT(CN)<sub>6</sub>-TBA<sup>+</sup>CN<sup>-</sup> mixtures in MeCN solutions: time dependent spectra for the HAT(CN)<sub>6</sub>-TBA<sup>+</sup>CN<sup>-</sup> molar ratio 1:5 (a), 1:10 (b) and 1:15 (c); molar ratio dependent spectra after 2 min from mixing (d).

## Cyclic Voltammetry

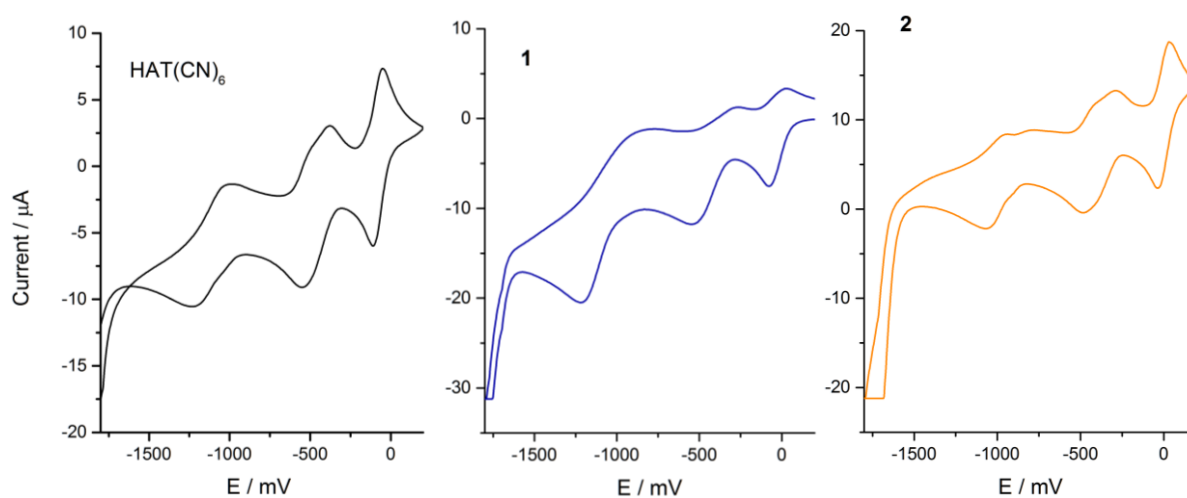

**Table S8.** Peaks in cyclic voltammogram of **1**, **2** and HAT(CN)<sub>6</sub>

| Compound             | Anodic Peaks [mV] | Cathodic Peaks [mV] |
|----------------------|-------------------|---------------------|
| HAT(CN) <sub>6</sub> | -986              | -1243               |
|                      | -376              | -551                |
|                      | -51               | -110                |
| <b>1</b>             | -776              | -1220               |
|                      | -268              | -548                |
|                      | 28                | -76                 |
| <b>2</b>             | -941              | -1073               |
|                      | -782              | -905                |
|                      | 295               | -485                |
|                      | 29                | -40                 |

## IV. Computational Details and additional calculated data

**Technical details of periodic models calculations:** All of the reported computations used first-principles Density Functional Theory (DFT).<sup>1</sup> The periodic network calculations were performed with the Vienna ab-initio Simulation Package (VASP), version 5.3.5.<sup>2</sup> The projector augmented wave (PAW) method<sup>3</sup> was used to treat the core states along with a plane-wave basis set with an energy cutoff of either 400 eV, for geometry optimizations, or 500 eV, for computing electronic charge densities and electrostatic potential (ESP) maps. The H 1s, C, N 2s/2p, P, Si 3s/3p, As, Ge 4s/4p, and Fe, Co 4s/3d electrons were treated explicitly in the calculations. We used the GGA functional of Perdew-Burke-Ernzerhof (PBE)<sup>4</sup> in tandem with the 3<sup>rd</sup>-generation Grimme set of semiempirical dispersion corrections<sup>5</sup> (PBE-D3), as implemented when using the IVDW=12 tag that is available in VASP.<sup>6</sup> The k-point grids were generated using the  $\Gamma$ -centered Monkhorst-Pack scheme, and the number of divisions along each reciprocal lattice vector was chosen such that the product of this number with the real lattice constant was 10 Å in the geometry optimizations, and 30 Å otherwise. The geometries of all the structures were converged such that the magnitude of the largest force acting on the constituent atoms was less than, at most, 0.02 eV/Å<sup>2</sup>. The atomic coordinates of all of the crystal structures were optimized using the cell parameters that were obtained from X-ray diffraction studies. Additionally, a Hubbard correction potential was used, within the framework of the GGA+U method<sup>7</sup> without LSDA exchange splitting. The calculations presented in this report used U-J=2. U-J=0 and U-J=4 were also used in order to compute  $\Delta E_{\text{int}}$  for compounds **2** and **4** and to ensure that the results were qualitatively similar; it was found that the interaction energy of HAT(CN)<sub>6</sub> was unaffected by U-J ranging from 0 to 4, but the band gap, as could be expected, was found to increase with larger values of U-J. The qualitative features and differences of the DOS plots were described similarly for all the U-J values, particularly: 1) the HAT(CN)<sub>6</sub> character of the conduction bands, 2) the M[(CN)<sub>6</sub>]<sup>3-</sup> character of the valence bands, and 3) the influence of the spin density near the Fermi energy in compound **1**. We also computed the electronic structures of compounds **1** and **2**, in their PBE+D3+2U geometries, with the HSE06 functional<sup>8</sup> in order to compare their band gaps when they are independent on the U-J parameter. The Bader charges were computed by using a freely available script<sup>9</sup> to parse the topology of the computed valence charge density.

**Definition of  $\Delta E_{\text{int}}(\mathbf{X})$  for periodic models:** The interaction energy of HAT(CN)<sub>6</sub> in compound **X**,  $\Delta E_{\text{int}}(\mathbf{X})$ , was computed as:

$$\Delta E_{\text{int}}(\mathbf{X}) = E_{\mathbf{X}} - (E_{\mathbf{X-HAT}} + E_{\text{HAT}}),$$

where  $E_{\mathbf{X}}$  is the DFT electronic ground-state energy of compound **X**,  $E_{\mathbf{X-HAT}}$  is the energy of compound **X** with the HAT(CN)<sub>6</sub> molecules removed, and  $E_{\text{HAT}}$  is the energy of the HAT(CN)<sub>6</sub> sublattice when frozen in the geometry that it assume in compound **X**. As such,  $\Delta E_{\text{int}}(\mathbf{X})$  includes the interactions of HAT(CN)<sub>6</sub> with everything else in the crystal, not just with the [M(CN)<sub>6</sub>]<sup>3-</sup> complexes.

Analogously, the charge density difference in compound **X**, CDD(**X**) can be defined as:

$$\text{CDD}(\mathbf{X}) = \Delta\rho(\mathbf{X}) = \rho_{\mathbf{X}} - (\rho_{\mathbf{X-HAT}} + \rho_{\text{HAT}})$$

where  $\rho_{\mathbf{X}}$  is the computed electronic charge density of **X**.

To estimate the strength of the [M(CN)<sub>6</sub>]<sup>3-</sup>-HAT(CN)<sub>6</sub> interactions in compound **X**, we computed a corrected interaction energy,  $\Delta E_{\text{int, HAT/MCN}}(\mathbf{X})$ , as

$$\Delta E_{\text{int, HAT/MCN}}(\mathbf{X}) = \Delta E_{\text{int}}(\mathbf{X}) - (E_{\mathbf{X-MCN,15} \rightarrow 14} - E_{\mathbf{X-MCN-HAT,15} \rightarrow 14} - E_{\text{HAT}})$$

where  $E_{X-MCN,15\rightarrow14}$  is the DFT electronic ground-state energy of compound **X** with the  $[M(CN)_6]^{3-}$  complexes removed and the P/As atoms replaced with Si/Ge,  $E_{X-MCN-HAT,15\rightarrow14}$  is the electronic energy of compound **X** with the  $[M(CN)_6]^{3-}$  and  $HAT(CN)_6$  complexes removed and the P/As atoms replaced with Si/Ge, and  $E_{HAT}$  is the electronic energy of the  $HAT(CN)_6$  sublattice when frozen in the geometry that they assume in compound **X**. The substitution of P/As with Si/Ge is necessary to balance the charge in the periodic simulation cell and is, itself, an approximation. We have estimated the impact that such a substitution has on the binding energies with a non-periodic molecular cluster of  $HAT(CN)_6$  and  $APh_4^{(0,+)}$  molecules (where A = Si/Ge for  $APh_4$ , or P/As for  $APh_4^+$ ); this is illustrated below in Fig. S26 where, overall, the substitution was found to have a small effect on the binding energy of  $HAT(CN)_6$  in the molecular cluster.

*A comment on the treatment of dispersion forces:* We note that the post-SCF dispersion correction that was used in our PBE-D3 models accounts, in itself, for 60% of the total interaction energies. Since the inclusion of dispersion effects is so important in these systems, we also computed the interaction energy for compounds **1**, **2** and **4** with another type of DFT functional that accounts for dispersion forces in a modified Hamiltonian, the vdW-optB88 type of functional.<sup>10</sup> We found the vdW-optB88 functional to predict larger (more negative) interaction energies:  $\Delta E_{int,optB88}(\mathbf{1}) = -158$ ,  $\Delta E_{int,optB88}(\mathbf{2}) = -161$ , and  $\Delta E_{int,optB88}(\mathbf{4}) = -161$  kcal·mol<sup>-1</sup>. These represent an increase of 25-30% vs. the PBE-D3 interaction energies, further illustrating how important the inclusion/treatment of dispersion effects is to these systems. Our estimate of the interaction energy between  $HAT(CN)_6$  and  $[M(CN)_6]^{3-}$  in compound **2** was found to be  $\Delta E_{int,HAT/MCN}(\mathbf{2}) = -93$  kcal·mol<sup>-1</sup> with vdW-optB88, a 15% increase over the PBE-D3 estimate. This suggests that we are likely underestimating the strength of the interaction energies in the main text. The computed band structures and density of states plots with the vdW-optB88 functional were found to agree very well the PBE-D3 functional. In this respect, we are confident that the treatment of dispersion with a post-SCF dispersion correction is sufficient here, within the framework of DFT, in emphasizing the importance of the  $HAT(CN)_6$ - $[M(CN)_6]^{3-}$  interactions to the total interaction energy.

*Technical details of molecular cluster (non-periodic) models calculations:* Dispersion-corrected DFT-D3<sup>5</sup> calculations, using the Amsterdam Density Functional (ADF) package, version 2013.01,<sup>11</sup> were also performed on selected molecular clusters extracted directly from the optimized coordinates of **1** and **2**. The computations employed the PBE functional<sup>4</sup> and a relativistic all-electron triple- $\xi$  doubly polarized (TZ2P) basis set from the ADF basis set library. Scalar relativistic effects were incorporated in the computations by means of the Zeroth-Order Regular Approximation (ZORA).<sup>12</sup> Interaction between fragments was analyzed by means of the Extended Transition State – Natural Orbitals for Chemical Valence (ETS-NOCV) charge and energy decomposition scheme.<sup>13</sup>

*Extended Transition State – Natural Orbitals for Chemical Valence (ETS-NOCV) method:* In the original Extended transition state (ETS) method, the interaction energy,  $\Delta E_{int}$ , between the fragments in the geometry of the system is divided into following components:

$$\Delta E_{int} = \Delta E_{elstat} + \Delta E_{Pauli} + \Delta E_{orb} (+ \Delta E_{disp})$$

The first term,  $\Delta E_{elstat}$ , corresponds to the classical electrostatic interaction between the fragments in the combined system. The second component,  $\Delta E_{Pauli}$ , accounts for the repulsive Pauli interaction between occupied orbitals on the two fragments. The third term,  $\Delta E_{orb}$ , represents the stabilizing interactions between the occupied molecular orbitals on one fragment with the unoccupied molecular orbitals of the other fragment (corresponding to inter-fragments donation and back-donation charge transfers), as well as the mixing of occupied and virtual orbitals within the same fragment (intra-fragment polarization, charge redistribution). The last contribution,  $\Delta E_{disp}$ , obtained at DFT-D3 level,



referred to as the dispersion term, corresponds to the dispersion interaction between the fragments in the combined system.

The natural orbitals for chemical valence (NOCV) are eigenvectors that diagonalize the charge density difference matrix. The NOCV pairs ( $\psi_{-k}$ ,  $\psi_k$ ) decompose the charge density difference CDD into NOCV contributions,  $CDD_{NOCV\ k}$ :

$$CDD = \sum_{k=1}^{M/2} v_k [-\psi_{-k}^2 + \psi_k^2] = \sum_{k=1}^{M/2} CDD_{NOCV\ k}$$

where  $v_k / M$  stand for the NOCV eigenvalues / the number of basis functions. Visual inspection of  $CDD_{NOCV\ k}$  plots helps to attribute symmetry and the direction of the charge flow. Within the ETS-NOCV scheme, information gained from the analysis of  $CDD_{NOCV\ k}$  plots can be enriched by providing the orbital energy contributions  $\Delta E_{NOCV\ k}$  from  $CDD_{NOCV\ k}$  to the total orbital interaction energy  $\Delta E_{orb}$ .

#### Additional calculated data:

#### Electrostatic Potential (ESP) Maps and Charge Density Difference (CDD) Plots

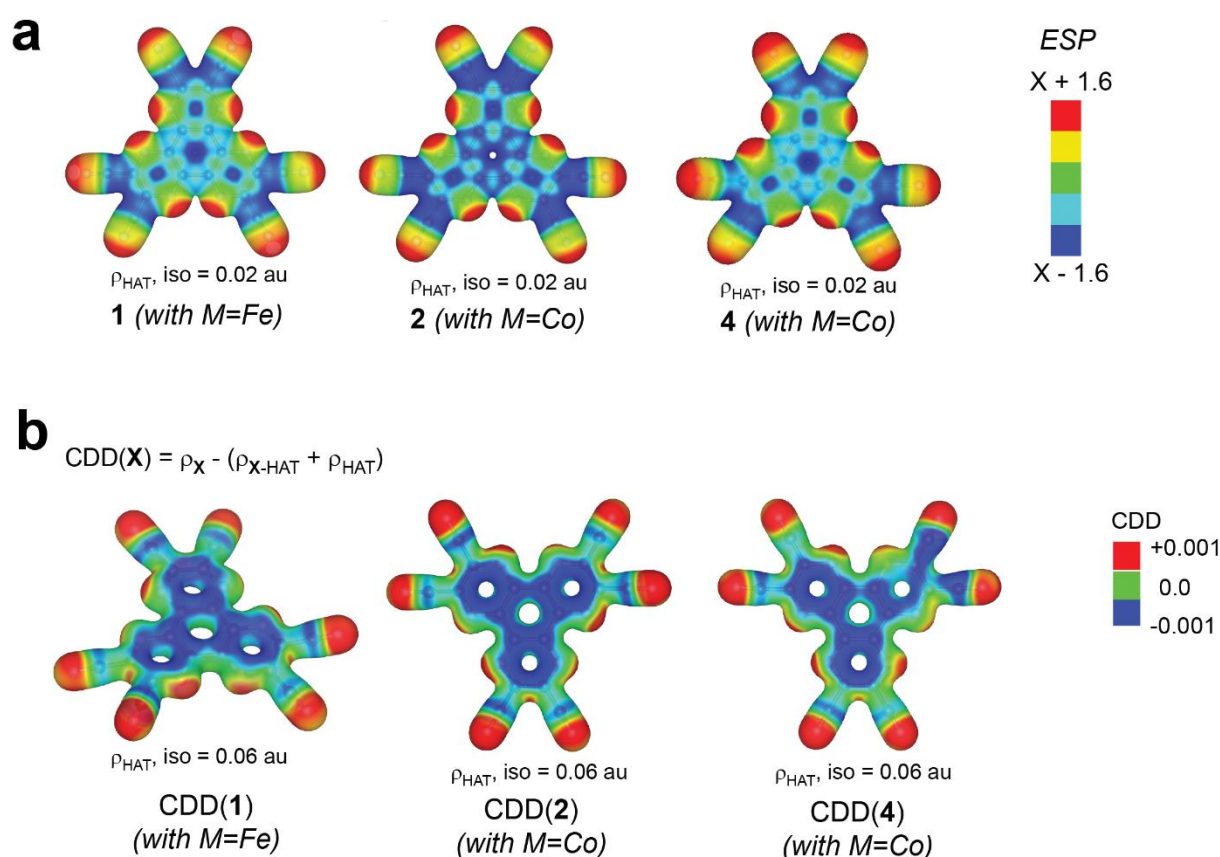

**Figure S23.** (a) The computed electrostatic potential (ESP) around  $HAT(CN)_6$  in three crystal structures: (left) in compound **1**, (middle) in compound **2**, and (right) in compound **4**. The ESP is coloring an isosurface of the total electron density from a single  $HAT(CN)_6$  molecule. (b) The charge density difference (CDD) surrounding a  $HAT(CN)_6$  in (left) compound **1**, (middle) compound **2**, and (right) compound **4**. The CDD is coloring an isosurface of the total electron density from a single  $HAT(CN)_6$  molecule.

Figure S23 shows the computed ESP and CDD profiles, as shown for **2** in Figure 3 of the main text, for compounds **1**, **2**, and **4**. They can all be seen to be quite similar in these representations, but a broken

symmetry in the CDD around  $\text{HAT}(\text{CN})_6$  is visible in compound **4**; this broken symmetry comes about from the asymmetrically crystallized  $\text{H}_2\text{O}$  molecule.

### Computed Band Structures and Densities of States

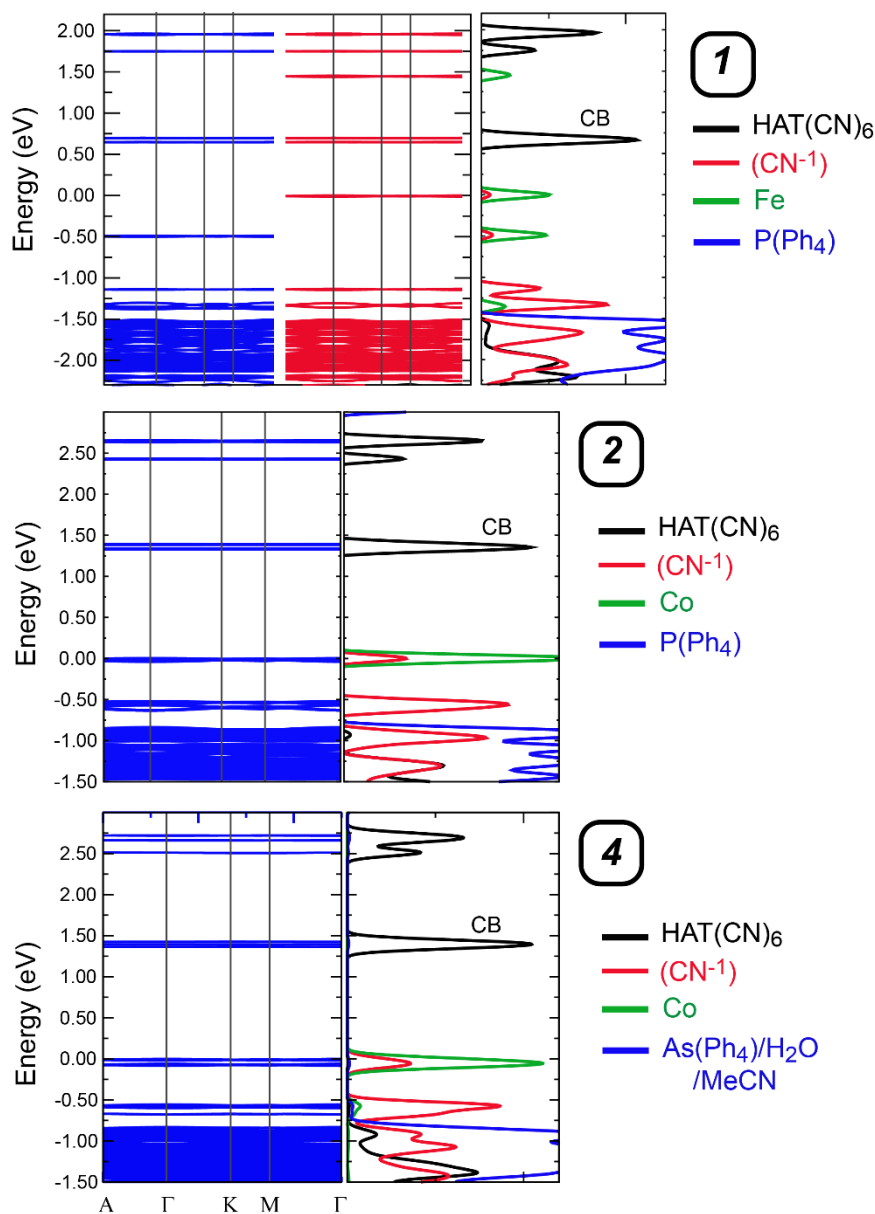

**Figure S24.** The computed (PBE-D3+U; U-J=2 eV) electronic band structures of compounds **1** (top), **2** (middle), and **4** (bottom). The two spin components are shown for compound **1** as blue and red; compounds **2** and **4** have closed-shell electronic configurations. The Fermi energy is set to zero in each plot. Summed atom-projected density of states, the PDOS - computed electronic density of states projected onto the atoms of the molecular building blocks, are shown to the right of each band structure. The PDOS was computed with electronic smearing (SIGMA=0.06 eV in VASP) to help with its visibility. The lines in the PDOS are colored according to the building block to which they correspond, and the location of the conduction band, "CB", is shown.

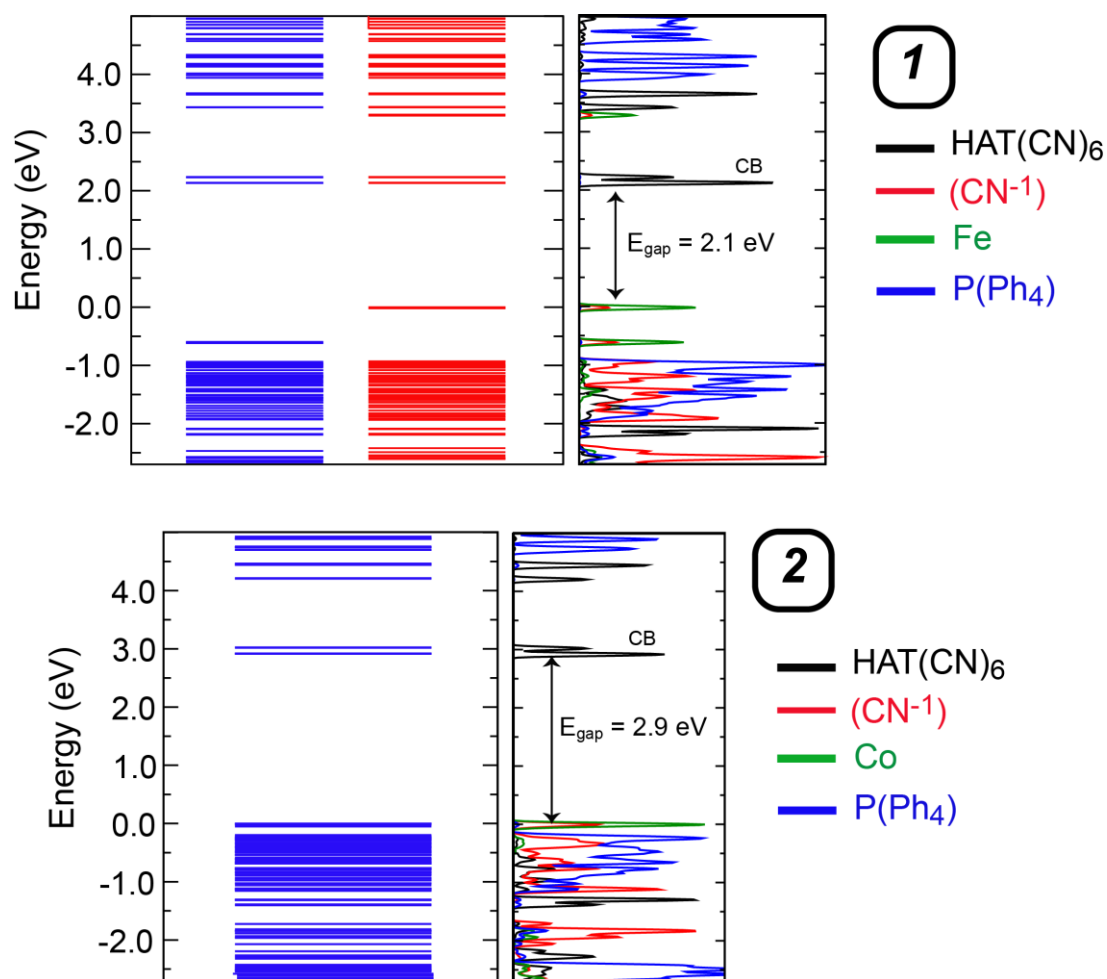

**Figure S25.** The computed electronic band energies of compounds **1** (top), and **2** (bottom) when computed with a single k-point with the hybrid HSE06 density functional. The two spin components are shown for compound **1** as blue and red; compound **2** has a closed-shell electronic configuration. The Fermi energy is set to zero in each plot. Summed atom-projected density of states, ie. the PDOS – the computed electronic density of states projected onto the atoms of the molecular building blocks, are shown to the right of each band structure. The PDOS was computed with electronic smearing (SIGMA=0.02 eV in VASP) to help with its visibility. The lines in the PDOS are colored according to the building block to which they correspond, and the location of the conduction band, “CB”, is shown.

With both the PBE+D3+U (Figure 24) and HSE06 (Figure S25) functionals, the conduction bands in every compound were found to have  $\pi$ -symmetry  $\text{HAT}(\text{CN})_6$  character. The occupied bands near the Fermi energy have  $\text{M}[(\text{CN})_6]^{3-}$  character. We note that there are conceptual differences which relate with the presence/absence of spin density near the band gap in **1/2**, most obviously the smaller band gap in **1** vs **2** and the Fe-based band that lies over 3.0 eV above the Fermi energy in **1**. This suggests tangible electronic structure differences between **1** and **2** that would influence their electronic excitations.

#### Estimating the interactions between $\text{HAT}(\text{CN})_6$ and $\text{APh}_4$

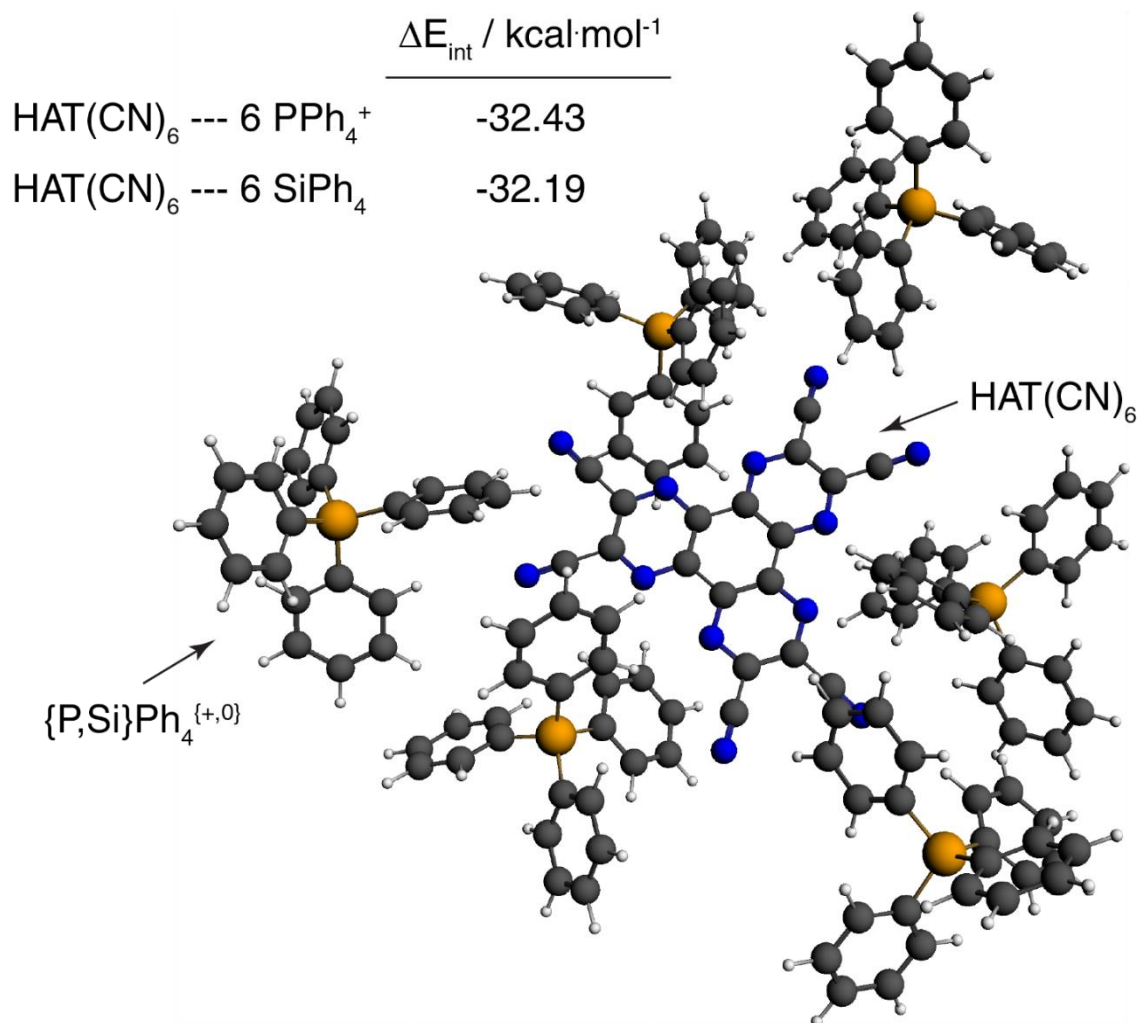

**Figure S26.** Interaction energy between  $\text{HAT}(\text{CN})_6$  and a  $\text{XPh}_4^n$  network ( $\text{X} = \text{P}$ ,  $n = +1$ ;  $\text{X} = \text{Si}$ ,  $n = 0$ ) in a molecular cluster extracted from the optimized geometry of compound **2**.

The molecular cluster that was extracted from compound **2** to study the interaction of  $\text{HAT}(\text{CN})_6$  with the  $\{\text{P,Si}\}\text{Ph}_4^{\{+,0\}}$  network is shown in Figure S26; it consists of one  $\text{HAT}(\text{CN})_6$  molecule surrounded by six  $\text{PPh}_4^+ / \text{SiPh}_4$  molecules. The substitution of P with Si is found to have a small effect on the binding energy when frozen the network in the geometry that was obtained in compound **2**.

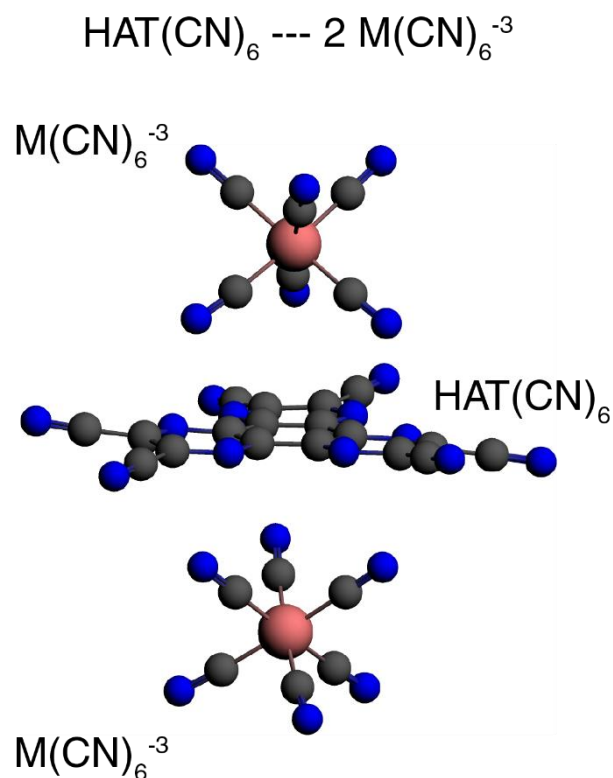

|                            | M =               |                   |
|----------------------------|-------------------|-------------------|
|                            | Fe <sup>III</sup> | Co <sup>III</sup> |
| $\Delta E_{\text{int}}$    | -150.53           | -150.92           |
| $\Delta E_{\text{orb}}$    | -                 | -56.70            |
| $\Delta E_{\text{Pauli}}$  | -                 | 34.24             |
| $\Delta E_{\text{elstat}}$ | -                 | -112.19           |
| $\Delta E_{\text{disp}}$   | -                 | -16.26            |

**Figure S27.** Structure of the molecular clusters that were extracted from compounds **1** and **2**. The interaction energy and its decomposition (in kcal·mol<sup>-1</sup>) within the ETS scheme are shown in the table below.

The total interaction energy of  $\text{HAT}(\text{CN})_6$  in the molecular cluster geometries that are extracted from **1** and **2** are comparable with each other, like they are in the periodic calculations, but both are substantially higher than the -78 to -81 kcal/mol estimates that were obtained from the periodic calculations. This is not unexpected considering the large contribution of the electrostatic term,  $\Delta E_{\text{elstat}}$ , to the total interaction energy. Since the charge deformation density of the molecular cluster resembles the charge deformation density of the periodic crystal, we focus here on  $\Delta E_{\text{orb}}$ , the contribution that comes about from charge transfer between and within fragments.

a) 
$$\text{CDD} = \rho(\text{HAT}(\text{CN})_6 \cdots 2 \text{Co}(\text{CN})_6^{-3}) - (\rho(\text{HAT}(\text{CN})_6) + \rho(2 \text{Co}(\text{CN})_6^{-3}))$$

isosurface = 0.001 au

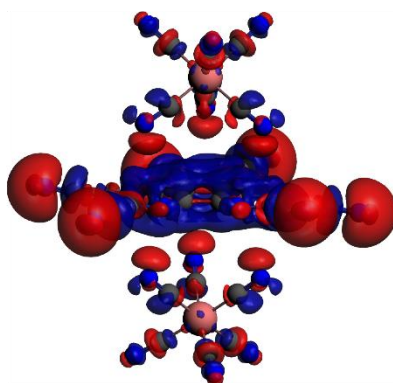

b)  $\text{CDD}_{\text{NOCV } k}$

isosurface = 0.0001 au

■  $\Delta\rho > 0$ , +, CD accumulation  
■  $\Delta\rho < 0$ , -, CD depletion

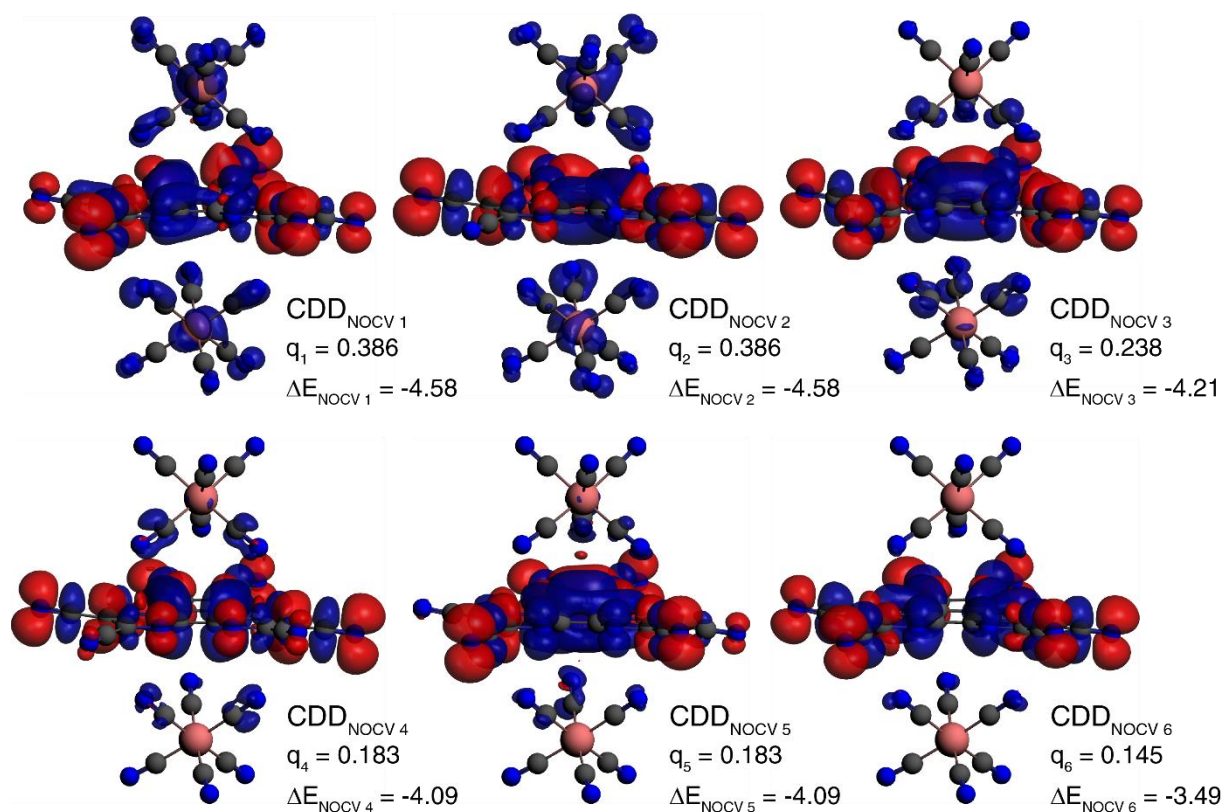

**Figure S28.** (a) The total charge deformation density (CDD) of the molecular cluster extracted from compound **2** (it is identical to the CDD that is shown in Figure 3c of the main text). (b) The six largest contributions to the CDD that arise from an ETS-NOCV analysis of the molecular cluster. Isosurfaces of the charge deformation densities that are associated with each NOCV contribution,  $\text{CDD}_{\text{NOCV } k}$ , are shown. Also shown alongside each  $\text{CDD}_{\text{NOCV } k}$  is its corresponding charge transfer ( $q_k = v_k$ ) and its contribution to the orbital interaction energy ( $\Delta E_{\text{NOCV } k}$  in kcal·mol<sup>-1</sup>). Red / blue indicates a gain-of-charge / loss-of-charge, respectively.

## V. References

- 
- <sup>1</sup> W. Kohn, L. J. Sham, *Phys. Rev.* 1965, **140**, A1133.
- <sup>2</sup> (a) G. Kresse, J. Hafner, *Phys. Rev. B* 1993, **47**, 558; (b) G. Kresse, J. Furthmuller, *Phys. Rev. B* 1996, **54**, 11169.
- <sup>3</sup> (a) P. E. Blöchl, *Phys. Rev. B* 1994, **50**, 17953; (b) G. Kresse, D. Joubert, *Phys. Rev. B* 1999, **59**, 1758.
- <sup>4</sup> (a) J. P. Perdew, K. Burke, M. Ernzerhof, *Phys. Rev. Lett.* 1996, **77**, 3865; (b) J. P. Perdew, K. Burke, M. Ernzerhof, *Phys. Rev. Lett.* 1997, **78**, 1396.
- <sup>5</sup> S. Grimme, J. Antony, S. Ehrlich, H. Krieg, *J. Chem. Phys.* 2010, **132**, 154104.
- <sup>6</sup> S. Grimme, S. Ehrlich, L. Goerigk, *J. Comp. Chem.* 2011, **32**, 1456.
- <sup>7</sup> A. I. Liechtenstein, V. I. Anisimova, J. Zaanen, *Phys. Rev. B* 1995, **52**, R5467.
- <sup>8</sup> A. V. Krukau, O. A. Vydrov, A. F. Izmaylov, and G. E. Scuseria, *J. Chem. Phys.* 2006, **125**, 224106.
- <sup>9</sup> W. Tang, E. Sanville, G. Henkelman, *J. Phys.: Condens. Mat.* 2009, **21**, 084204.
- <sup>10</sup> (a) J. Klimes, D. R. Bowler, A. Michaelides, *J. Phys.: Condens. Mat.* 2010, **132**, 022201; (b) M. Dion, H. Rydberg, E. Schroder, D. C. Langreth, B. I. Lundqvist, *Phys. Rev. Lett.* 2004, **92**, 246401.
- <sup>11</sup> (a) ADF2013, SCM, Theoretical Chemistry, Vrije Universiteit, Amsterdam, The Netherlands, <http://www.scm.com>; (b) C. F. Guerra, J. G. Snijders, G. te Velde, E. J. Baerends, *Theor. Chem. Acc.* 1998, **99**, 391; (c) G. te Velde, F. M. Bickelhaupt, E. J. Baerends, C. F. Guerra, S. J. A. van Gisbergen, J. G. Snijders, T. Ziegler, *J. Comput. Chem.* 2001, **22**, 931.
- <sup>12</sup> (a) E. van Lenthe, E. J. Baerends, J. G. Snijders, *J. Chem. Phys.* 1993, **99**, 4597; (b) E. van Lenthe, E. J. Baerends, J. G. Snijders, *J. Chem. Phys.* 1994, **101**, 9783; (c) E. van Lenthe, A. E. Ehlers, E. J. Baerends, *J. Chem. Phys.* 1999, **110**, 8943; (d) E. van Lenthe, J. G. Snijders, E. J. Baerends, *J. Chem. Phys.* 1996, **105**, 6505.
- <sup>13</sup> (a) M. Mitoraj, A. Michalak, *J. Mol. Model.* 2007, **13**, 347; (b) M. P. Mitoraj, A. Michalak, T. Ziegler, *J. Chem. Theory Comput.* 2009, **5**, 962.
